# Supplementary material
Source: PubMed Central journal article supplement (PMC5287396)
Supplement: JB.00743-16_zjb999094316s1.pdf [file JB.00743-16_zjb999094316s1.pdf]

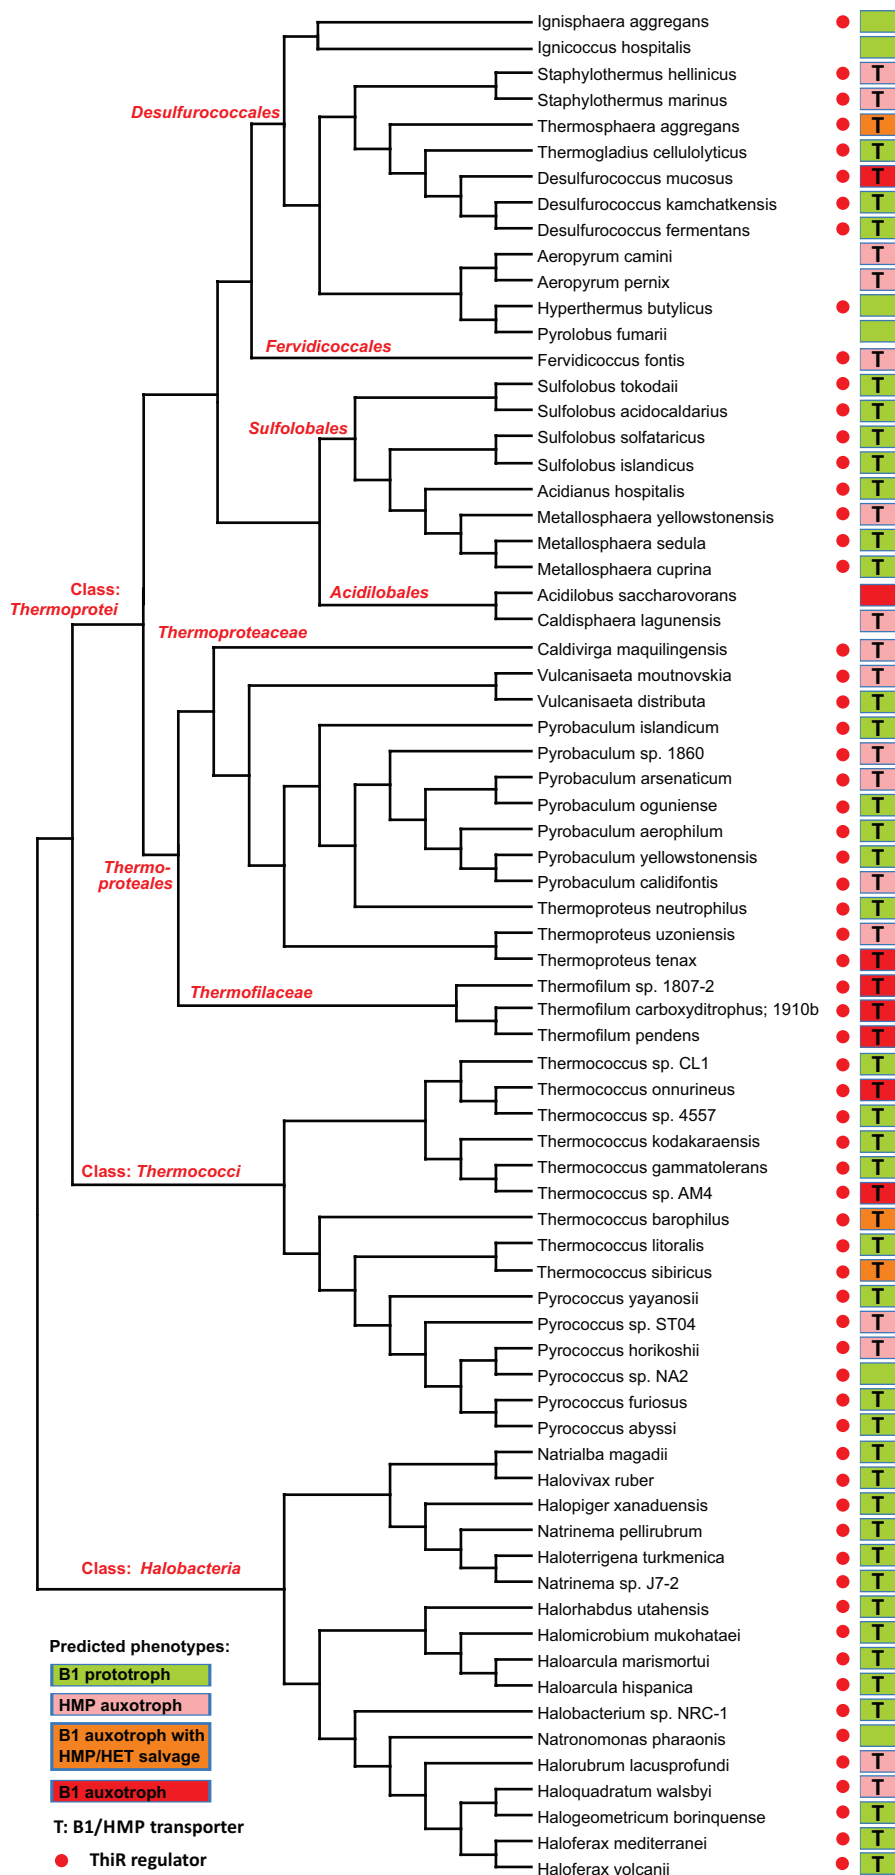

**Figure S1. Distribution of thiamine biosynthesis pathways, transporters and regulators in Archaea.**

The phylogenetic species tree was constructed using the concatenated alignment of 78 universal bacterial proteins. The tree includes the analyzed representatives of three archaeal lineages possessing *thiR* orthologs.

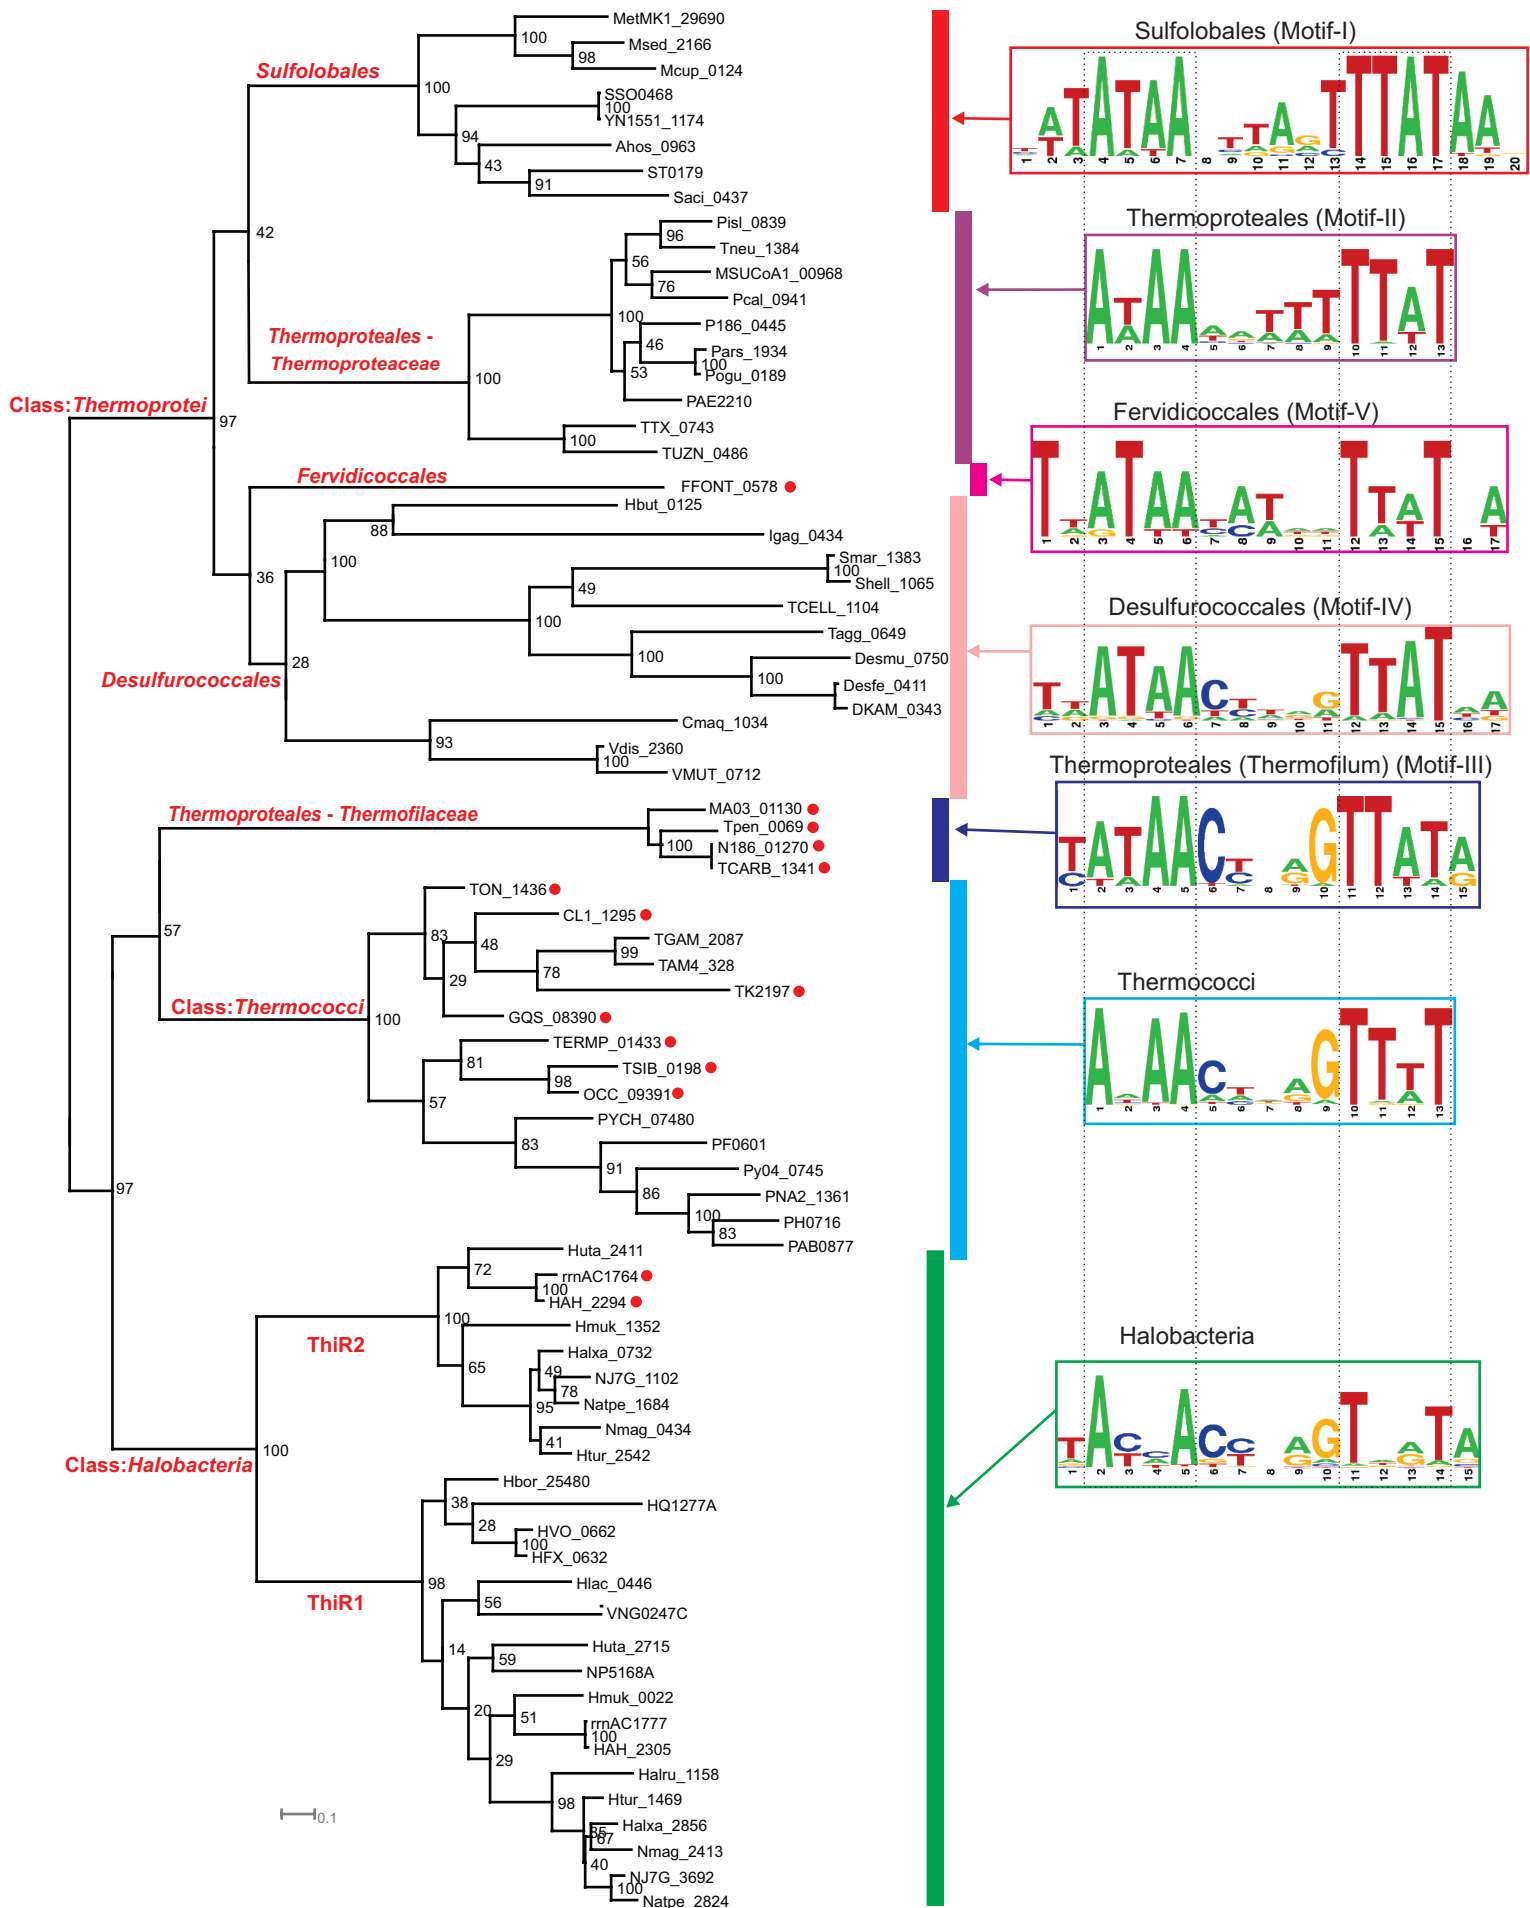

**Figure S2. Phylogenetic tree of the ThiR proteins and their predicted lineage-specific DNA motifs.**

Red dots show ThiRs that are predicted to be autoregulated, as the *thiR* genes belong to ThiR regulons.

**Figure S3. Phylogenetic footprinting of upstream regions of thiamine biosynthesis/transport genes and identification of candidate ThiR-binding sites in diverse archaeal lineages.**

**A. *Sulfolobales* (Motif I)**

**Upstream promoter regions of *thi4***

|              | wTATAAnnnnnnTTATAw                                                                                         | Site scores |
|--------------|------------------------------------------------------------------------------------------------------------|-------------|
| MetMK1_23630 | CCAT <u><b>GGTTGGAT</b></u> ----- <u><b>TATATAACTAGTTTATAAGCCACTAA</b></u> TATTACGATGTA <b>ACTATG</b> 5.89 |             |
| Mcup_0086    | TTGTGTCGTTTTTAA <u><b>TATATAACTAGCTTATAAG</b></u> TCGGTTAAATGTTGATGATAT <b>ATG</b> 5.82                    |             |
| Msed_2221    | TTCTCATCGT-CACCTA <u><b>TTTATAACTTAGTTTATAAG</b></u> TGAGTTAAATGAAGATTTGTC <b>ATG</b> 5.98                 |             |
| Saci_0854    | TGATATAAAAATA--- <u><b>CATATAAGTGAGTTTATAAC</b></u> CTATTTAATTGATAAGAC--- <b>ATG</b> 5.60                  |             |
| YN1551_1140  | TTGTCCACGTTTCATGAT <u><b>TATAAAAAGTTAATTTATAAG</b></u> TGAGTTATATCAGTTT <b>AGATT-ATG</b> 5.66              |             |
| SSO0436      | TTGTCTATGTATAACAT <u><b>TATAAAAAGTTAATTTATAAG</b></u> CAAGTTATATCATT <b>TTAGATT-ATG</b> 5.66               |             |
| Ahos_0692    | TCTTAAATGA <b>ACTC</b> --- <u><b>TATATAACTTAGTTTATAAG</b></u> TAAGTTAT <b>TATGAAGTAAACACATG</b> 5.91       |             |
|              | * * * * * * * * * * * * * *                                                                                |             |

**Upstream promoter regions of *thi7***

|              | wTATAAnnnnnnTTATAw                                                                                                     | Site scores |
|--------------|------------------------------------------------------------------------------------------------------------------------|-------------|
| MetMK1_19590 | TCGCAATAT <u><b>GTTAT</b></u> ----- <u><b>GCTAAATAAGTAAGTTTATAACCGACTTA</b></u> TCATAAATCTGAT-C <b>ATG</b> 5.27        |             |
| Saci_2110    | TTGAAA---GTTAT-----AGGATTTGA <u><b>ATATAACTAAGTTTATAACT</b></u> TTGCTTATATGAAACTTAATTT <b>ATG</b> 5.21                 |             |
| YN1551_2514  | CTCAGGGCTGATTTGGTGATGGTCTATTA <b>AAAAATTC</b> <u><b>AAAATAAGTGACTTTATAAG</b></u> TACTAATTATCATT <b>TTTACATATG</b> 5.25 |             |
| SSO1593      | CTCAGGGCTGATTTGGTGATGGTCTATTA <b>AAAAATTC</b> <u><b>AAAATAAGTGACTTTATAAG</b></u> TACTAATTATCATT <b>TTTACATATG</b> 5.25 |             |
| SI1132       | TTTAAATCTTTTT-----CAGTGGAA <b>TTT</b> <u><b>CATATAAGTAGGTTTATAAG</b></u> TAGTAATATACAATATCA <b>ATATG</b> 5.52          |             |
| Ahos_0145    | --GAAATCTGATAT-----GCTTT <u><b>CTTATAAGTAAGTTTATAAT</b></u> TATCTTATAACAAGATT <b>TACACATG</b> 5.80                     |             |
|              | * * * * * * * * * * * * * * * * * *                                                                                    |             |

**Upstream promoter regions of *tenA***

|              | wTATAAnnnnnnTTATAw                                                                               | Site scores |
|--------------|--------------------------------------------------------------------------------------------------|-------------|
| MetMK1_24350 | ---AGCTGACGTCCT <u><b>ATAACTAGATTATAAAATGATTTATATC</b></u> CCGCCACTCTAG-TGGGATGT <b>ATG</b> 5.09 |             |
| SSO2089      | CATAGATAG----ATATAAGTAA <u><b>GTTATAAAATAATTTATAAT</b></u> CTAGCTTTGTAATTTATA <b>AAATG</b> 5.51  |             |
| YN1551_2613  | TATGGCTAG----ATATAAGCAA <u><b>CTTATAAAATGATTTATAAT</b></u> CTAGCTTTGTAATTTATAG <b>TTATG</b> 5.40 |             |
|              | * * * * * * * * * * * * * * * * * *                                                              |             |

Candidate ThiR-binding sites are highlighted in yellow. 18-nt consensus site is given on top of each alignment. Translation start sites are in red. Individual site scores are given at right side. Experimentally determined transcription start sites (TSSs) in *Sulfolobus solfataricus* (SSO0436, SSO1593, SSO2089) (Wurtzel et al., 2010) are underlined/in bold (all three transcripts are leaderless). A TATA-like conserved core promoter motifs, centered ~26 nt upstream of TSSs are highlighted in green. 35-bp DNA fragments from *Metallosphaera yellowstonensis* MK1 that were tested in DNA binding assays are underlined and in bold.

**Figure S3. Phylogenetic footprinting of upstream regions of thiamine biosynthesis/transport genes and identification of candidate ThiR-binding sites in diverse archaeal lineages.**

**B. Thermococcales**

**Upstream promoter regions of *thi4***

|            | AWAACnnnGTTWT                | AWAACnnnGTTWT             | Site scores                   |                    |
|------------|------------------------------|---------------------------|-------------------------------|--------------------|
| Py04_1231  | AATACCTTGTATAACAAAGTTTTAAAT  | TGATAAACTTAGTTTTGGAAT     | -----GGTGAAGAGCATG 5.13/ 5.46 |                    |
| PH1357     | AAAATAATCCTATAACAAAGTTTTAAAT | TATAAAATGAAGTTTTAGGC      | -----GGTGGGGAAGATG 5.13/ 4.51 |                    |
| PAB0536    | AAAAGTTCCTATAACAAAGTTTTTAAT  | TGCTAAAACCTAAGTTTTTGC     | -----GGGGGTAAAGATG 5.10/ 5.40 |                    |
| PNA2_1941  | CAGGGTTCCTATAACAAAGTTTTTAAT  | TGCTAAAACCTGAGTTTTCGAT    | -----GGTGATGGTGATG 5.13/ 5.30 |                    |
| PF1530     | CCATGATGAAAAAAACAAAGTTTTTAT  | TATATAAAACCTCAGTTTTGAGT   | -----GGTGAATAAGATG 5.29/ 5.30 |                    |
| OCC_06556  | ATAACTTGGTTATAATAAAGTTTTTAA  | ATTCAAAACCTCAGTTTTTACTGG  | AGTTTTAAAAGATTTACGGGTGAGGGG   | AAAATG 4.73/ 5.30  |
| PYCH_06240 | -----GTATAACAAAGTTTTTAAGT    | CTCAAAAACCTTAGTTTTGCCTGGT | CTTATAAAATTTTG---GGGGTGCGAAA  | ATG 5.46/ 5.13     |
| CL1_0036   | AAAACCCCTTTATAACAAAGTTTTTAA  | ATTCAAAACCTCAGTTTTTACCGCG | GCTTAAAAGGTTTT---GGGTGGTGGC   | ATG 5.13/ 5.30     |
| TGAM_1270  | AAAACCCGTTTATAACAAAGTTTTTAA  | ATTCAAAACCTTAGTTTTGAGCGGA | ACTTAAAAGGTTTT---GGGTGGTCGG   | GATG 5.55/ 5.17    |
| GQS_02015  | AAAACCCGTTTATAACAAAGTTTTTAA  | ATTCAAAACCTTAGTTTTGAGCGGG | ACTTAAAAGGTTTT---GGGTGGTGG    | GATG 5.13/ 5.46    |
| TK0434     | TAACCATTTATAACAAAGTTTTTAA    | ATCTCAAAAACCTTAGTTTTGAGCG | CGGTTTTAAAAGGTTTT---AGGTGGT   | GGGCATG 5.13/ 5.46 |
|            | **** *                       | **** *                    | * ***                         |                    |

**Upstream promoter regions of *thiB***

|           | AWAACnnnGTTWT               | AWAACnnnGTTWT               | Site scores               |                            |
|-----------|-----------------------------|-----------------------------|---------------------------|----------------------------|
| TSIB_0369 | -TTGCGAT--GGGGAAGCTTTTTAAAT | CACATTCAGAACACAGTTTATGTATAT | ATAAAATTAGTTTTAGGTGAAGGAG | ATGAAGAAGCT 4.49 / 4.86    |
| PF1751    | -----ATCAGGGAAGG-TTTTTAAAC  | CTCCCTAGAACACAGTTTTGAAAGA   | ATAGAAAATGGGTTTTAGGTGAT   | GAGCATGAAGAGTT 4.65 / 3.94 |
| OCC_11612 | GCCCCGATGAGGGAAGATTTTTAAAC  | CTCCCTAGAACACAGTTTTGGAAGA   | ATAGAAAATGGGTTTTAGGTGAT   | GAGCATGAAGAGTT 4.65 / 3.94 |
|           | ** ** * *                   | ***** ** * *                | ** * ** * ** * ** * *     |                            |

Candidate ThiR-binding sites are highlighted in yellow. 15-nt consensus site is given on top of each alignment. Most of the identified ThiR sites in Thermococcales are organized in tandems and have a fixed 21-nt distance between the site centers. Translation start sites are in red. Experimentally determined transcription start sites (TSSs) in *Pyrococcus furiosus* (PF1751, PF1530) (Yoon et al., 2011) are underlined/in bold. ). A TATA-like conserved core promoter motifs, centered ~26 nt upstream of TSSs are highlighted in green. Individual site scores are given at right side.

**Figure S3. Phylogenetic footprinting of upstream regions of thiamine biosynthesis/transport genes and identification of candidate ThiR-binding sites in diverse archaeal lineages.**

**C. Halobacteria**

**Upstream promoter regions of *thi4***

|            |                                                  | <b>TAYnACnnnGTnRTAYnACnnnGTnRTA</b>      | Site scores |
|------------|--------------------------------------------------|------------------------------------------|-------------|
| HFX_0634   | TCCCGTCAGAAGTCGCC---ATCAGTAGA---TTT              | TACTACTGGTGGT <b>ACTAAGTAGT</b> ATGTC    | 4.69/ 4.65  |
| HVO_0665   | CTAGGTCGCCGCGCGCG---ACCACCAGAT---TTT             | TACTACTAGGTAGTAT <b>ACTAAGTAGT</b> ATGTC | 4.57/ 4.65  |
| Hlac_2980  | TTACCCTCCGAGAAACCGACCGACCACAACCCT- <u>TG</u>     | TACCACGGGAGAT <b>ACTAAGTGGT</b> ATGAC    | 3.90/ 4.77  |
| Nmag_2419  | TGCGAATC-----ATCGCGACAGACTTTT                    | CTACTGGATGAT <b>ACCCTAGTTGT</b> ATGAG    | 3.90/ 4.68  |
| Htur_1462  | TATCCGTGGCT-----C-ATCAGTAGACTTTT                 | CACCACGGGTGCT <b>ACCACCAAGTTGT</b> ATGAG | 3.53/ 4.68  |
| Halxa_2863 | TATCAGCAGCGCAAC-----ATCAGTAGAGTTT                | CACCCTGAGTCT <b>ACCACCTAGTTGT</b> ATGAG  | 3.37/ 4.68  |
| NJ7G_3680  | TTCCGATCGCG-----GCTGCGATAGGCTTTT                 | CTACTACCAAGT <b>ACCACCTAGTTGT</b> ATGAG  | 3.90/ 4.68  |
| Natpe_2830 | TTCGGGCATCG-----GCTGCGATAGACTTTT                 | TACTAGGTCA <b>ACCACCTAGTTGT</b> ATGAG    | 4.08/ 4.68  |
| Hmuk_0002  | GTGCAATCGCGTCAGCGAGTCCAGACCGGAACCCTAT- <u>IG</u> | CAACGGTGGT <b>ACCCTAGTTGT</b> ATGAG      | 3.48/ 4.68  |
| rrnAC1782  | TGCGAGCAGCGACTGGTCTCTGCATCAGAACG- <u>ACTATG</u>  | TACCACCAAGAGAT <b>ACTAGTTGT</b> ATGAG    | 3.90/ 4.63  |
| HAH_2313   | ATTCTAGCAACAGACGAGGCC--ATCAGAACG- <u>ACTATG</u>  | TACCACCAAGAA <b>ACTACTAGTTGGT</b> ATGAG  | - / 4.75    |

**Upstream promoter regions of *thiC***

|            |                                                                                              | <b>TAYnACnnnGTnRTAYnACnnnGTnRTA</b>                       | Site scores |
|------------|----------------------------------------------------------------------------------------------|-----------------------------------------------------------|-------------|
| Hbor_14920 | GGTCGGCAACGC-----T                                                                           | TATTTCGGTAGT <b>ACTAGT</b> AGTTCGATGACG---ACGCAGTTCACACGC | 3.96/ 4.41  |
| Halru_0933 | TCACCGCTCCACAGGTAT <b>TATGACT</b> TAGTAGT <b>ACTAGT</b> GATC- <u>ATG</u>                     | CCCGGTACCCAACGCCAGGCAGC                                   | 4.10/ 4.41  |
| HVO_2154   | CCCGCCCGTCACAAGT <b>TATTA</b> ACTAGT <b>TGT</b> AT <b>ACT</b> AGCTAA <b>TCA</b> <u>ATG</u>   | CGCTCGACACAGCTCCAACACGC                                   | 3.66/ 3.84  |
| VNG_0715G  | CGTCGACCAGTGATT- <u>TTATTA</u> TCTAGTGGT <b>ATC</b> ACTAAGTA <b>ATT</b> GATGTC               | ---ACACAGCTCCAACACGC                                      | 4.06/ 4.40  |
| NP2210A    | ACCCGGCAGTAG---TTTT <b>TATTAG</b> CTGGT <b>TGT</b> AT <b>ACT</b> AGATT <b>GTT</b> GATGACG    | ---ACGCAACTACAGCACGC                                      | 3.97/ 3.74  |
| HFX_2195   | GCCGTTGTCTATAAAGAT <b>TATCAG</b> TAGTGGT <b>ATA</b> ACTAGTGGT <b>TAT</b> ATG                 | CGCTCAACTCAAATGCGGTGC                                     | 4.24/ 4.43  |
| Hmuk_2297  | GACGAGACTGGGAAGTT <b>TATAA</b> TCTAGT <b>GAT</b> ATA <b>ACT</b> AGCTT <b>ATC</b> TATGACG     | ---ACCCAGCTCCAGCGTGC                                      | 3.99/ 3.70  |
| rrnAC1182  | GTTCGACCATAGTGTT- <u>TTATAA</u> CTTGGT <b>AGT</b> ATA <b>ACT</b> AGT <b>GAT</b> - <u>ATG</u> | -----ACGCAGATGGCAGCAGC                                    | 4.50/ 4.37  |
| HAH_1784   | ACCGATCACCGCAGCT- <u>TTATAA</u> CCAAGT <b>AGT</b> ATA <b>ACT</b> AGT <b>GAT</b> - <u>ATG</u> | -----ACGCAGTAGCAGCGGC                                     | 4.50/ 4.37  |
| Nmag_2593  | GATCGGTGCCACGAAT- <u>TTATAA</u> TCTAGT <b>TAATA</b> CA <b>ACT</b> AGT <b>TATC</b> ATG        | GGTCAACCCAGCTAGTGTGC                                      | 3.87/ 4.27  |
| Halxa_3896 | GTGACGGGACAACAT- <u>TTATAA</u> CTAGAT <b>ATA</b> CA <b>ACT</b> AGT <b>TATC</b> GATG          | CGCAACCCAAATGCGCGCG                                       | 3.44/ 4.27  |
| Htur_1332  | TCCAGCGCAAGCGCT- <u>ATATAA</u> CTCGAT <b>GATA</b> CA <b>ACT</b> AGT <b>TATC</b> GATG         | CGCAACCCAGATCCAAGCGC                                      | 4.01/ 4.27  |
| NJ7G_3772  | CGGAGCCGATAGTGAT- <u>TTATAA</u> TTCAGT <b>TAATA</b> CA <b>ACT</b> AGT <b>TATC</b> GATG       | CCGACAGCTCAGATCCAAGCGC                                    | 3.91/ 4.27  |
| Natpe_3081 | CGGGAGCGGGAGAGTT- <u>TTATAA</u> CTAGT <b>ATA</b> CA <b>ACT</b> AGT <b>TATC</b> GATG          | TCGAAAACGCAGATTCAGCGCG                                    | 4.50/ 4.27  |

**Upstream promoter regions of *thiBPQ***

|            |                                                                                 | <b>TAYnACnnnGTnRTAYnACnnnGTnRTA</b> | Site scores |
|------------|---------------------------------------------------------------------------------|-------------------------------------|-------------|
| Huta_0388  | AACGCGAGAGGTTTAA <b>TACC</b> ACT <b>AGTCA</b> AT <b>CCACCAAGTGGT</b> AAACGACG   | AAACGACG                            | 3.84/ 4.44  |
| Htur_2516  | ATCAGA-GGGATTAA- <b>GACC</b> AC <b>CCAGTGG</b> AA <b>CCACCGTGAAT</b> GAGACGACG  | GAGACGACG                           | 4.21/ 3.87  |
| rrnAC0147  | AACAGC-GGGATTAA <b>TACC</b> ACT <b>GGGTGT</b> GA <b>CCACGGTGAATG</b> GATAGACG   | GATAGACG                            | 3.86/ 3.49  |
| HAH_0897   | AACACC-GGCGTTAAG <b>TACC</b> ACT <b>GGGTGT</b> GA <b>CCACGGAGTAATG</b> GATAGACG | GATAGACG                            | 3.86/ 3.90  |
| HVO_0022   | ATCAGC-CCCGTTAAG <b>TACC</b> AC <b>AGTAC</b> AA <b>CAACCGAGTAATG</b> AGACGACG   | AGACGACG                            | 3.23/ 4.15  |
| HFX_0021   | ATCAGC-GGCGTTAAG <b>TACC</b> AC <b>AGTAC</b> AA <b>CAACCGAGTAATG</b> AGACGACG   | AGACGACG                            | 3.23/ 4.13  |
| Nmag_0460  | ATCA----ACTTAC <b>AACC</b> AC <b>AGAGTGT</b> AA <b>CCACTGGGTGATG</b> AGACGACG   | AGACGACG                            | 3.53/ 4.40  |
| NJ7G_0450  | ATCAGC-GGTCTTAA- <b>GACT</b> AC <b>CTAGTGC</b> AA <b>CCACCGGTAATG</b> AGACGACG  | AGACGACG                            | 3.32/ 4.26  |
| Natpe_3863 | ATCAC--GCCGTTTAA <b>GACC</b> ACT <b>AGTGT</b> AA <b>CCACCGAGTAATG</b> GATCGACG  | GATCGACG                            | 3.91/ 4.28  |
| Halxa_0707 | ATCACA-GCGTTAA- <b>GACC</b> ACT <b>CACTAG</b> AA <b>CAACCGCGTAATG</b> AGACGACG  | AGACGACG                            | 4.11/ 3.78  |
| Hbor_02000 | ATGACG-CAGGTTAAG <b>TATG</b> AC <b>CAAGTGG</b> GA <b>CTACTCAGTAATG</b> AGACGACG | AGACGACG                            | 3.55/ 4.15  |
| Hlac_2697  | CGCGGATCCTTTTGT <b>AACC</b> AC <b>CGGTGT</b> AA <b>CAACCGGTAATG</b> ACTAACGA    | ACTAACGA                            | 3.90/ 4.13  |
| Halru_0146 | AAATGCTGGTTCTTAA <b>GACC</b> AC <b>CCAGTGG</b> GA <b>CCATCCAGTAATG</b> AGACGACG | AGACGACG                            | 3.96/ 3.68  |

Candidate ThiR-binding sites are highlighted in yellow. 15-nt consensus site is given on top of each alignment. Most of the identified ThiR sites in *Halobacteria* are organized in tandems that overlap by 2 nt (the overlapping nucleotides are highlighted in red). Translation start sites are in red. Experimentally determined transcription start sites in *Haloferax volcanii* (*thi4*, *thiC*) (J. Maupin-Furlow, personal communication) are underlined. A TATA-like conserved core promoter motifs, centered ~26 nt upstream of TSSs are highlighted in green. Individual site scores are given at right side. Weaker sites with scores that are 15% less than the threshold (3.85 for *Halobacteria*) are underlined. Consensus AC/GT positions are in bold.

**Figure S3. Phylogenetic footprinting of upstream regions of thiamine biosynthesis/transport genes and identification of candidate ThiR-binding sites in diverse archaeal lineages.**

**D. Thermoproteales – Pyrobaculum spp. (Motif II)**

**Upstream promoter regions of thi4**

|               |                              | AWAAWnnnWTTWT         |                                      | Site scores |
|---------------|------------------------------|-----------------------|--------------------------------------|-------------|
| Pisl_1998     | CCCGTCTCTTAGGGCTG-TTCAGCGGTG | AAAAGATATTTAT         | CTATACCACATTTATTACTTATGGAGTTAAAAATCG | 4.44        |
| Tneu_1052     | GCGGCTGTGGTGGGTAGCTTCTGCGTCC | AAAATCTATTTAT         | TTGGATTATATTTGTTGCTTATGGAGCTGAAGATCG | 4.46        |
| MSUCoA1_02190 | GCCGTC-----GTCGCCTTCGAG---   | ATAATATATTTAT         | AGTCATATCATTTAGTACTTATGGAGCTGAAGATCG | 4.96        |
|               | * * * * *                    | * * * * * * * * * * * | * * * * * * * * * * *                |             |

**Common upstream promoter regions of divergently transcribed genes thiT and thi4**

|           |                    | AWAAWnnnWTTWT         |                                                                                              | Site scores |
|-----------|--------------------|-----------------------|----------------------------------------------------------------------------------------------|-------------|
| PAE0176   | <i>thiT</i> <- CAT | AAGCCAATATTC          | AAATCTAAATAAAAATATTTATCTCGGCGATTACGCCG-GAGAAAAATTTATTATGAATTCGGATAATTACTTTATG -> <i>thi4</i> | 5.16 / 4.79 |
| P186_0937 | CAT                | AAGCAACTACTTGATTC     | CAATAAAAACATTTATCCCCACGGATACGCTGAGAGAAAAATTTATTATAGAAATCGGATAATGTGGTTATG                     | 4.88 / 4.79 |
|           | * * * * *          | * * * * * * * * * * * | * * * * * * * * * * *                                                                        |             |

**Common upstream promoter regions of divergently transcribed genes tenA and thiT**

|               |                           | AWAAWnnnWTTWT                       |                                                         | Site scores |
|---------------|---------------------------|-------------------------------------|---------------------------------------------------------|-------------|
| MSUCoA1_02193 | <i>tenA</i> <- TCTCCGATGC | CATAAACAGCTAATGAAGTGGTATAAAAAGATTTT | TGGAAAAATATATTTATATGGATTAGATAAAGCTTTATGG -> <i>thiT</i> | 4.30 / 4.79 |
| Tneu_1075     | TC                        | CGGTGGCCATATCCCCCTCTGTCTGCACAT----- | AAAAATTTTTTATATGGAAGTCATCAGCCTTTTATGG                   | 5.12        |
| Pisl_1973     | TTCCGTTGC                 | CATATACGTCAGATCTCCGCCTAT-----       | AAAAATTTTTTATATGGAAAAGATCAATTAGTTATGG                   | 5.12        |
|               | * * * * *                 | * * * * * * * * * * *               | * * * * * * * * * * *                                   |             |

**Upstream promoter regions of tenA**

|           |                            | AWAAWnnnWTTWT                 |                                           | Site scores |
|-----------|----------------------------|-------------------------------|-------------------------------------------|-------------|
| P186_0930 | TAAA-----TCAGTGTA-----     | ATAACGTTTTTAT                 | TATTCAGGGGATAAATGTCCTATGTCGTCGGCTGAGTTGAG | 4.62        |
| Pogu_2702 | TAAAGCCGCTCTGCGCCTCTGTATGT | CGGCAAAGGATTTTTCATAAAGTTTTTAT | AGGTCCTAGATAAATGTCCTATGCTACGGAGGAGTTGAG   | 5.01        |
| Pars_2186 | TAAAGCCGCTCTGCGCCTCTGTTTGT | CGGCAAAGGATTTTTCATAAAGTTTTTAT | AGGTCCTAGATAAATGTCCTATGCTACGGAGGAGTTGAG   | 5.01        |
| PAE0170   | TA-----CTCCCCCTTTTAT-----  | ATAAAAATTTTTAT                | CCCGATTAGATAAATTCACTTATGGTAACCTGGGAGTTGAG | 5.29        |
|           | * * * * *                  | * * * * * * * * * * *         | * * * * * * * * * * *                     |             |

**Upstream promoter regions of thiT**

|           |                              | AWAAWnnnWTTWT                             |                                            | Site scores |
|-----------|------------------------------|-------------------------------------------|--------------------------------------------|-------------|
| Pcal_0348 | GAAAAGCCCGCTCTGTTTTCCAAAGCGG | AAAACCCGCGATAAATGTCCTATGTCGTCGGCTGAGTTGAG | ---GACAAGTGGACTAGG                         | 4.68        |
| Pars_2195 | GAACACACCGATATTTA-----       | CGCAGATAAATATTTAAT                        | AGTAA-TTGGATTAGTTTGTATGCCTGAGAGTTGGAAGAGG  | 4.36        |
| Pogu_2693 | GGCCACGCCATTATCTA-----       | CGCAGATAAATATTTAAT                        | AGTAAATTTGGATTAGTTTATATGCCTGAGAGTTGGAAGAGG | 4.16        |
|           | * * * * *                    | * * * * * * * * * * *                     | * * * * * * * * * * *                      |             |

Candidate ThiR-binding sites are highlighted in yellow. 13-nt consensus site is given on top of each alignment. Translation start sites are in red. Individual site scores are given at right side.

**E. Thermoproteales – Thermofilum spp. (Motif III)**

**Upstream promoter regions of ykoEDC**

|            |                                          | TATAACnnnGTTATA       |                                                        | TATAACnnnGTTATA       |  | Site scores |
|------------|------------------------------------------|-----------------------|--------------------------------------------------------|-----------------------|--|-------------|
| Tpen_0068  | ATATCCTTTGAATGCATTAAACCGCTAGAGG----      | ATAA                  | CTTGGTTAAATTGAAAGATTCTTCTCTATAACCGAGTTATA-----TAAAAATA | ATAA                  |  | 5.02 / 5.43 |
| TCARB_1340 | --ATCTTACGACGAGA--AACTTTTAAAGGTAATC      | ATAA                  | CTCTGTTATGTTCTCA---TTTACCTCAAAACTCGGTTATAAAGAAATGAAATA | ATAA                  |  | 5.18 / 5.16 |
| N186_01265 | --ATCTTACGACGAGA--AACTTTTAAAGGTAATC      | ATAA                  | CTCTGTTATGTTCTCA---TTTACCTCAAAACTCGGTTATAAAGAAATGAAATA | ATAA                  |  | 5.18 / 5.16 |
|            | * * * * *                                | * * * * * * * * * * * | * * * * * * * * * * *                                  | * * * * * * * * * * * |  |             |
|            |                                          | TATAACnnnGTTATA       |                                                        |                       |  |             |
| Tpen_0068  | TTGIGCTTAACTTAAAG-----GCTACGGGAAAATT     | ATAA                  | CCAGGTTTGTAGTTTTCAACGCGATGAGGGAAGAAAACTCAGAGTAGAA      | ATAA                  |  | 5.06        |
| TCARB_1340 | ----CTTCTTCTTAAATGGTGGAAAGTCAAACGTTAAGCA | ATAA                  | ATCAGTTTAAAGAAATAAAA---AATGATGAACGAAAACTAAGAATTGAA     | ATAA                  |  | 5.22        |
| N186_01265 | ----CTTCTTCTTAAATGGTGGAAAGTCAAACGTTAAGCA | ATAA                  | ATCAGTTTAAAGAAATAAAA---AATGATGAACGAAAACTAAGAATTGAA     | ATAA                  |  | 5.22        |
|            | * * * * *                                | * * * * * * * * * * * | * * * * * * * * * * *                                  | * * * * * * * * * * * |  |             |

Candidate ThiR-binding sites are highlighted in yellow. 15-nt consensus site is given on top of each alignment. All identified ThiR sites in *Thermofilum* spp. are organized in tandems of three sites with variable distance between sites. Translation start sites are in red. Individual site scores are given at right side.



DNA-binding domain, XRE family (COG2522)

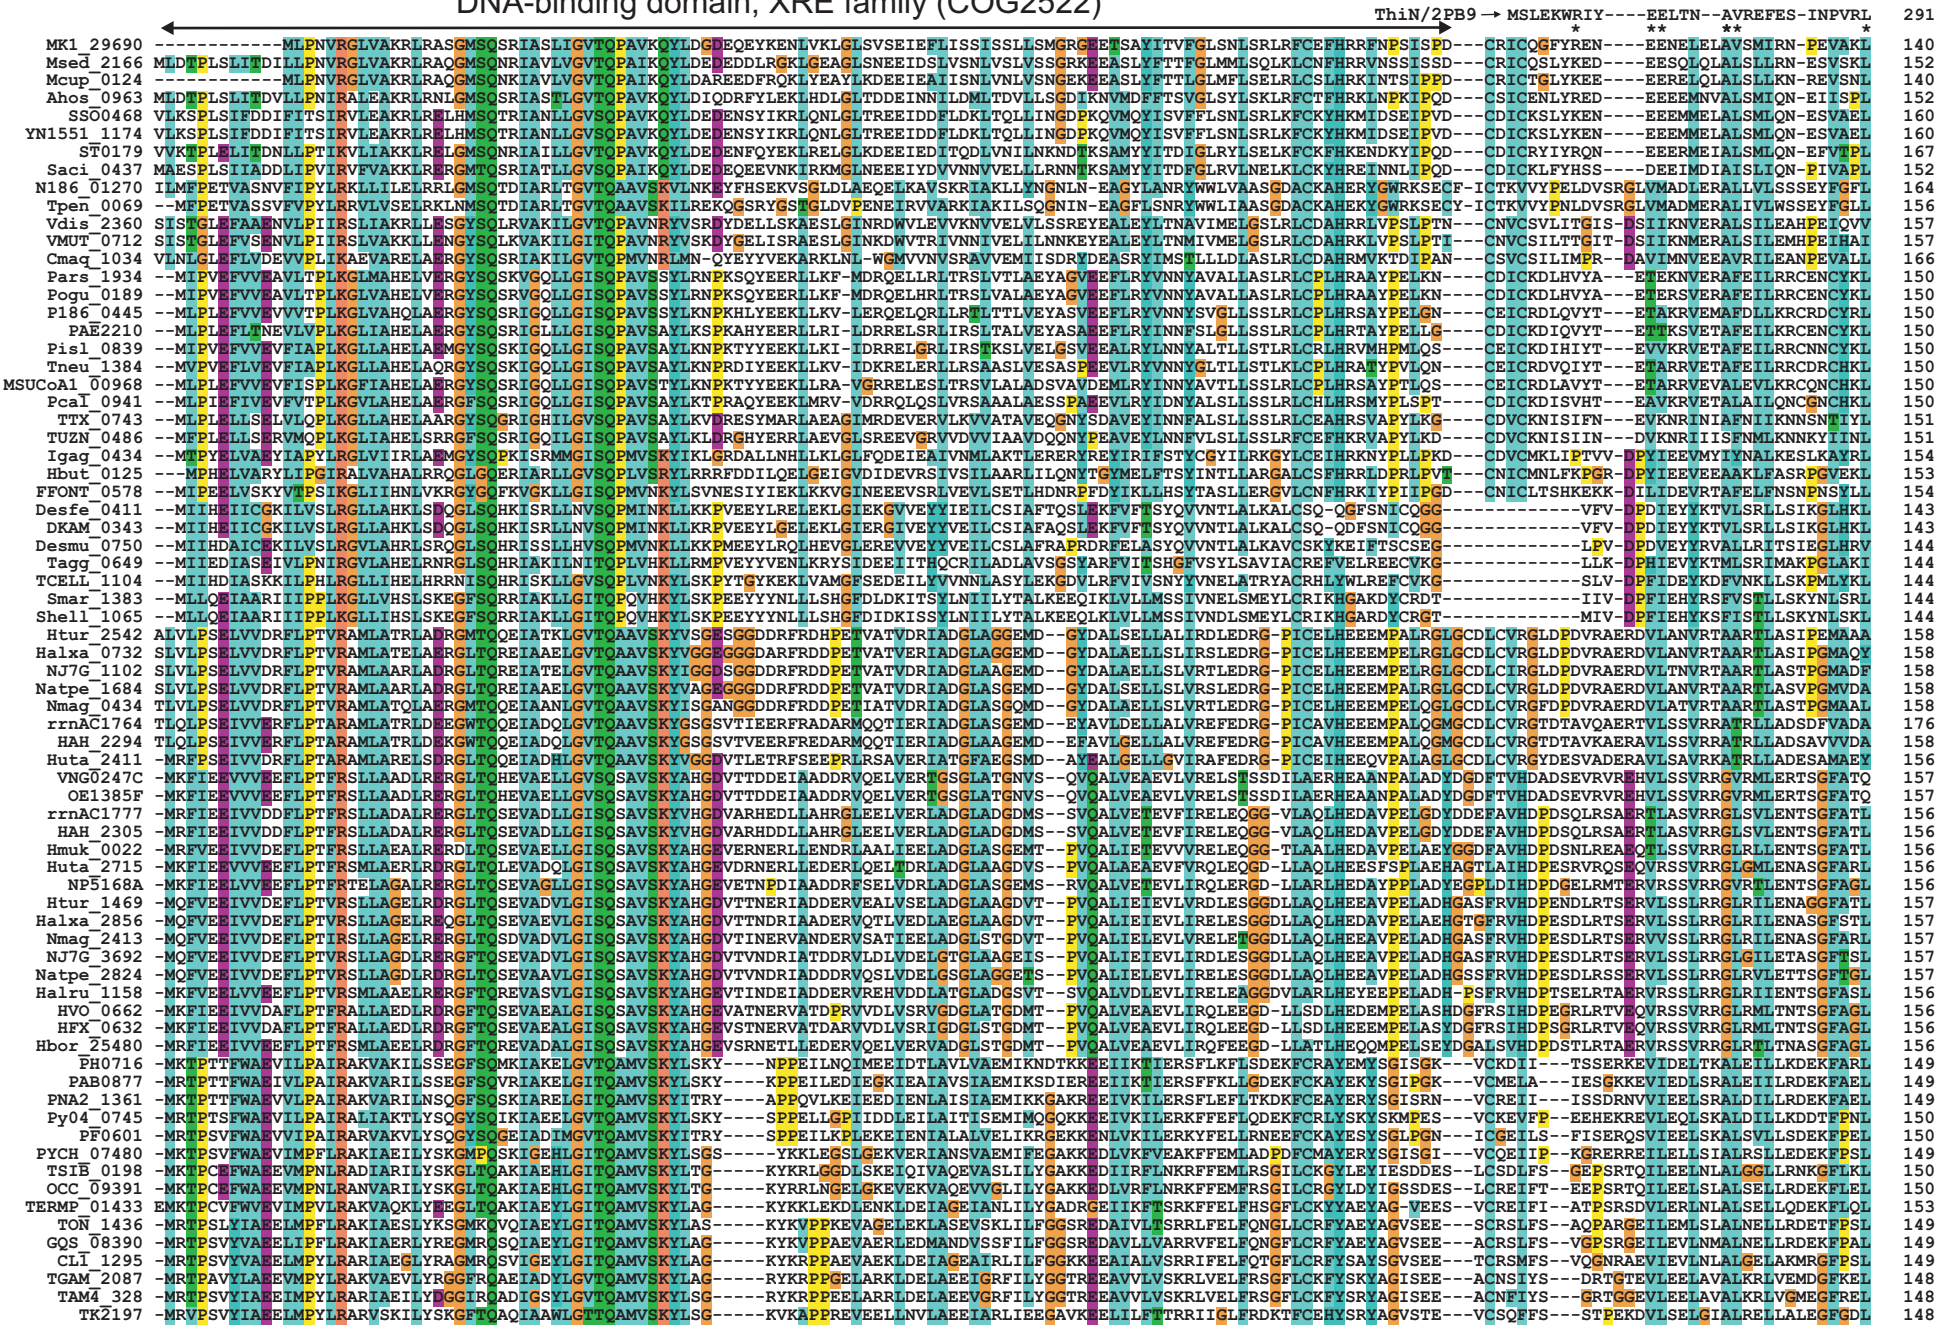

**Figure S4. Alignment of the thiamine regulators ThiR in Archaea.** MK1\_29690 denotes the characterized in this work ThiR protein from *Metallosphaera yellowstonensis*. Mk1. C-terminal domain in ThiR is aligned with thiamine phosphate synthase domain ThiN from *Pyrococcus furiosus*. (PDB ID 2PB9). Conserved residues in ThiR and ThiN proteins are marked with asterisk. Red asterisks indicate conserved residues that are presumably involved in thiamine phosphate binding, they were also bound phosphoric acid in 2PB9.

N298

R320

S339 H341

|               |                                                                                                                                                |     |
|---------------|------------------------------------------------------------------------------------------------------------------------------------------------|-----|
| ThiN/2PB9     | IPEVGTNFVYSLPL/RSTKDVAGVGRIVKYGNSVAVGPEVFCASDHLARVLTMYRFYEVRSAINIRYSREIIEEIEIAQERGFKVSFYDRREPEEIKAKEGATIPWG/ERPDIYIHLGDVKGEMILVFGNRPVLEKIKMLIE | 452 |
| MK1_29690     | VPEVLSNLAFAKSRNQSVDVAVAGRIAVIGGIPTPASRPTWGGSRHLATILLRLALKVCGKWRVAVMNIKFDRLVEQALKTAGLVYSKVGPSQDKDDRIAQMVASSLGDC----                             | 286 |
| Msed_2166     | IPEILSNLAYSKRDAEILDVLAIPGRIAVIGGVPTPASRPTWGGSRHLATILLEIRKRCERWRSVMNIKYDEKVEAILKSGRLRVKVPSSDRRDDSIANMVASVSSC----                                | 298 |
| Mcup_0124     | IPEVLSNLAISKRDADKADVLAIPGRIAVIGGLPTPASKPTWGGSRHLATILLEVRKCSKWRVSMNIKLYDCIEKALKQANLSKVVGPSDDKRDVSIARIVAAVMND----                                | 286 |
| Ahos_0963     | IPEVLSNLAIAKRNPKSLEDIIVAGRIIKIRNLPPTASKPMWAGSKHLNILLVSRKYPIRSVMNIKYDEKIKKCMDELKMKYAVIAPHDYATDIIETIASVMVFRPC----                                | 298 |
| SS00468       | IPEVLSNLAFAKANAKREEDVLAIPGRIIKIRNLPPTASKPMWAGSKHLAKVLLSVMKNHPAVRSVMNIKYDEKVEAILKSGRLRVKVPSSDRRDDSIANMVASVSSC----                               | 306 |
| YN1551_1174   | IPEVLSNLAFAKANAKREEDVLAIPGRIIKIRNLPPTASKPMWAGSKHLAKVLLSVMKNHPAVRSVMNIKYDEKVEAILKSGRLRVKVPSSDRRDDSIANMVASVSSC----                               | 306 |
| ST0179        | IPEVLSNLAFAKANPKGINDVLAIPGRIIKVKGIPPTASKPMWAGSKHLAKVLLSVMKNHPAVRSVMNIKYDEKVEAILKSGRLRVKVPSSDRRDDSIANMVASVSSC----                               | 313 |
| Saci_0437     | IQVLSNLAIAEQAKNEEDVLAIPGRIIRVLTGVPPTASKPMRAGSKHLRILLIKIKRRIRAVMNIKYDETKTFTVSOQLKVVVYVPHDYATNDEIAKIEVDAFDFTD----                                | 298 |
| N186_01270    | IPEVMSNLAIAVPAKSIYDVAAPGRIISRKTNVEIYRPFEGASRHLGGILLISNG---KFRAVMNIKYDEVIRSELISMGISFKFESSEDPANPAASAAADLLEKC----                                 | 309 |
| Tpen_0069     | IPEVLSNLAIAVPAKSIYDVAAPGRIISRKSGCELRYRPFEGASRHLGGILLISNG---KFRAVMNIKYDEVIRSELISMGISFKFESSEDPANPAASAAADLLEKC----                                | 301 |
| Vdis_2360     | IPEVLSNLAIAVPAKSIYDVAAPGRIISRKSGCELRYRPFEGASRHLGGILLISNG---KFRAVMNIKYDEVIRSELISMGISFKFESSEDPANPAASAAADLLEKC----                                | 301 |
| VMUT_0712     | IPEVLSNLAIAVPAKSIYDVAAPGRIISRKSGCELRYRPFEGASRHLGGILLISNG---KFRAVMNIKYDEVIRSELISMGISFKFESSEDPANPAASAAADLLEKC----                                | 305 |
| Cmaq_1034     | VPEVLSNLAIAVPAKSIYDVAAPGRIISRKSGCELRYRPFEGASRHLGGILLISNG---KFRAVMNIKYDEVIRSELISMGISFKFESSEDPANPAASAAADLLEKC----                                | 313 |
| Pars_1934     | VPEVLSNLAIAVPAKSIYDVAAPGRIISRKSGCELRYRPFEGASRHLGGILLISNG---KFRAVMNIKYDEVIRSELISMGISFKFESSEDPANPAASAAADLLEKC----                                | 287 |
| Pogu_0189     | VPEVLSNLAIAVPAKSIYDVAAPGRIISRKSGCELRYRPFEGASRHLGGILLISNG---KFRAVMNIKYDEVIRSELISMGISFKFESSEDPANPAASAAADLLEKC----                                | 287 |
| P186_0445     | VPEVLSNLAIAVPAKSIYDVAAPGRIISRKSGCELRYRPFEGASRHLGGILLISNG---KFRAVMNIKYDEVIRSELISMGISFKFESSEDPANPAASAAADLLEKC----                                | 287 |
| PAE2210       | VPEVLSNLAIAVPAKSIYDVAAPGRIISRKSGCELRYRPFEGASRHLGGILLISNG---KFRAVMNIKYDEVIRSELISMGISFKFESSEDPANPAASAAADLLEKC----                                | 287 |
| Pis1_0839     | VPEVLSNLAIAVPAKSIYDVAAPGRIISRKSGCELRYRPFEGASRHLGGILLISNG---KFRAVMNIKYDEVIRSELISMGISFKFESSEDPANPAASAAADLLEKC----                                | 287 |
| Tneu_1384     | VPEVLSNLAIAVPAKSIYDVAAPGRIISRKSGCELRYRPFEGASRHLGGILLISNG---KFRAVMNIKYDEVIRSELISMGISFKFESSEDPANPAASAAADLLEKC----                                | 287 |
| MSUCoA1_00968 | VPEVLSNLAIAVPAKSIYDVAAPGRIISRKSGCELRYRPFEGASRHLGGILLISNG---KFRAVMNIKYDEVIRSELISMGISFKFESSEDPANPAASAAADLLEKC----                                | 287 |
| Pca1_0941     | VPEVLSNLAIAVPAKSIYDVAAPGRIISRKSGCELRYRPFEGASRHLGGILLISNG---KFRAVMNIKYDEVIRSELISMGISFKFESSEDPANPAASAAADLLEKC----                                | 287 |
| TTX_0743      | VPEVLSNLAIAVPAKSIYDVAAPGRIISRKSGCELRYRPFEGASRHLGGILLISNG---KFRAVMNIKYDEVIRSELISMGISFKFESSEDPANPAASAAADLLEKC----                                | 290 |
| TUZN_0486     | VPEVLSNLAIAVPAKSIYDVAAPGRIISRKSGCELRYRPFEGASRHLGGILLISNG---KFRAVMNIKYDEVIRSELISMGISFKFESSEDPANPAASAAADLLEKC----                                | 291 |
| Igag_0434     | VPEVLSNLAIAVPAKSIYDVAAPGRIISRKSGCELRYRPFEGASRHLGGILLISNG---KFRAVMNIKYDEVIRSELISMGISFKFESSEDPANPAASAAADLLEKC----                                | 300 |
| FBUT_0125     | VPEVLSNLAIAVPAKSIYDVAAPGRIISRKSGCELRYRPFEGASRHLGGILLISNG---KFRAVMNIKYDEVIRSELISMGISFKFESSEDPANPAASAAADLLEKC----                                | 300 |
| FFont_0578    | IPEVLSNLAIAVPAKSIYDVAAPGRIISRKSGCELRYRPFEGASRHLGGILLISNG---KFRAVMNIKYDEVIRSELISMGISFKFESSEDPANPAASAAADLLEKC----                                | 300 |
| Desfe_0411    | IPEVLSNLAIAVPAKSIYDVAAPGRIISRKSGCELRYRPFEGASRHLGGILLISNG---KFRAVMNIKYDEVIRSELISMGISFKFESSEDPANPAASAAADLLEKC----                                | 287 |
| DKAM_0343     | IPEVLSNLAIAVPAKSIYDVAAPGRIISRKSGCELRYRPFEGASRHLGGILLISNG---KFRAVMNIKYDEVIRSELISMGISFKFESSEDPANPAASAAADLLEKC----                                | 287 |
| Desmu_0750    | IPEVLSNLAIAVPAKSIYDVAAPGRIISRKSGCELRYRPFEGASRHLGGILLISNG---KFRAVMNIKYDEVIRSELISMGISFKFESSEDPANPAASAAADLLEKC----                                | 288 |
| Tagg_0649     | IPEVLSNLAIAVPAKSIYDVAAPGRIISRKSGCELRYRPFEGASRHLGGILLISNG---KFRAVMNIKYDEVIRSELISMGISFKFESSEDPANPAASAAADLLEKC----                                | 288 |
| TCELL_1104    | IPEVLSNLAIAVPAKSIYDVAAPGRIISRKSGCELRYRPFEGASRHLGGILLISNG---KFRAVMNIKYDEVIRSELISMGISFKFESSEDPANPAASAAADLLEKC----                                | 288 |
| Smar_1383     | IPEVLSNLAIAVPAKSIYDVAAPGRIISRKSGCELRYRPFEGASRHLGGILLISNG---KFRAVMNIKYDEVIRSELISMGISFKFESSEDPANPAASAAADLLEKC----                                | 288 |
| Shell_1065    | IPEVLSNLAIAVPAKSIYDVAAPGRIISRKSGCELRYRPFEGASRHLGGILLISNG---KFRAVMNIKYDEVIRSELISMGISFKFESSEDPANPAASAAADLLEKC----                                | 288 |
| Htur_2542     | IPEVLSNLAIAVPAKSIYDVAAPGRIISRKSGCELRYRPFEGASRHLGGILLISNG---KFRAVMNIKYDEVIRSELISMGISFKFESSEDPANPAASAAADLLEKC----                                | 303 |
| Halxa_0732    | IPEVLSNLAIAVPAKSIYDVAAPGRIISRKSGCELRYRPFEGASRHLGGILLISNG---KFRAVMNIKYDEVIRSELISMGISFKFESSEDPANPAASAAADLLEKC----                                | 303 |
| NJ7G_1102     | IPEVLSNLAIAVPAKSIYDVAAPGRIISRKSGCELRYRPFEGASRHLGGILLISNG---KFRAVMNIKYDEVIRSELISMGISFKFESSEDPANPAASAAADLLEKC----                                | 303 |
| Natpe_1684    | IPEVLSNLAIAVPAKSIYDVAAPGRIISRKSGCELRYRPFEGASRHLGGILLISNG---KFRAVMNIKYDEVIRSELISMGISFKFESSEDPANPAASAAADLLEKC----                                | 303 |
| Nmag_0434     | IPEVLSNLAIAVPAKSIYDVAAPGRIISRKSGCELRYRPFEGASRHLGGILLISNG---KFRAVMNIKYDEVIRSELISMGISFKFESSEDPANPAASAAADLLEKC----                                | 303 |
| rrnA1_7757    | IPEVLSNLAIAVPAKSIYDVAAPGRIISRKSGCELRYRPFEGASRHLGGILLISNG---KFRAVMNIKYDEVIRSELISMGISFKFESSEDPANPAASAAADLLEKC----                                | 321 |
| HAH_2294      | IPEVLSNLAIAVPAKSIYDVAAPGRIISRKSGCELRYRPFEGASRHLGGILLISNG---KFRAVMNIKYDEVIRSELISMGISFKFESSEDPANPAASAAADLLEKC----                                | 303 |
| Huta_2411     | IPEVLSNLAIAVPAKSIYDVAAPGRIISRKSGCELRYRPFEGASRHLGGILLISNG---KFRAVMNIKYDEVIRSELISMGISFKFESSEDPANPAASAAADLLEKC----                                | 301 |
| VNG0247C      | IPEVLSNLAIAVPAKSIYDVAAPGRIISRKSGCELRYRPFEGASRHLGGILLISNG---KFRAVMNIKYDEVIRSELISMGISFKFESSEDPANPAASAAADLLEKC----                                | 302 |
| OE13857       | IPEVLSNLAIAVPAKSIYDVAAPGRIISRKSGCELRYRPFEGASRHLGGILLISNG---KFRAVMNIKYDEVIRSELISMGISFKFESSEDPANPAASAAADLLEKC----                                | 302 |
| rrnA1_1775    | IPEVLSNLAIAVPAKSIYDVAAPGRIISRKSGCELRYRPFEGASRHLGGILLISNG---KFRAVMNIKYDEVIRSELISMGISFKFESSEDPANPAASAAADLLEKC----                                | 298 |
| HAH_2305      | IPEVLSNLAIAVPAKSIYDVAAPGRIISRKSGCELRYRPFEGASRHLGGILLISNG---KFRAVMNIKYDEVIRSELISMGISFKFESSEDPANPAASAAADLLEKC----                                | 298 |
| Hmuk_0022     | IPEVLSNLAIAVPAKSIYDVAAPGRIISRKSGCELRYRPFEGASRHLGGILLISNG---KFRAVMNIKYDEVIRSELISMGISFKFESSEDPANPAASAAADLLEKC----                                | 298 |
| Huta_2715     | IPEVLSNLAIAVPAKSIYDVAAPGRIISRKSGCELRYRPFEGASRHLGGILLISNG---KFRAVMNIKYDEVIRSELISMGISFKFESSEDPANPAASAAADLLEKC----                                | 297 |
| NP51684       | IPEVLSNLAIAVPAKSIYDVAAPGRIISRKSGCELRYRPFEGASRHLGGILLISNG---KFRAVMNIKYDEVIRSELISMGISFKFESSEDPANPAASAAADLLEKC----                                | 298 |
| Htur_1469     | IPEVLSNLAIAVPAKSIYDVAAPGRIISRKSGCELRYRPFEGASRHLGGILLISNG---KFRAVMNIKYDEVIRSELISMGISFKFESSEDPANPAASAAADLLEKC----                                | 299 |
| Halxa_2856    | IPEVLSNLAIAVPAKSIYDVAAPGRIISRKSGCELRYRPFEGASRHLGGILLISNG---KFRAVMNIKYDEVIRSELISMGISFKFESSEDPANPAASAAADLLEKC----                                | 299 |
| Nmag_2413     | IPEVLSNLAIAVPAKSIYDVAAPGRIISRKSGCELRYRPFEGASRHLGGILLISNG---KFRAVMNIKYDEVIRSELISMGISFKFESSEDPANPAASAAADLLEKC----                                | 299 |
| NJ7G_3692     | IPEVLSNLAIAVPAKSIYDVAAPGRIISRKSGCELRYRPFEGASRHLGGILLISNG---KFRAVMNIKYDEVIRSELISMGISFKFESSEDPANPAASAAADLLEKC----                                | 299 |
| Natpe_2824    | IPEVLSNLAIAVPAKSIYDVAAPGRIISRKSGCELRYRPFEGASRHLGGILLISNG---KFRAVMNIKYDEVIRSELISMGISFKFESSEDPANPAASAAADLLEKC----                                | 299 |
| Halru_1158    | IPEVLSNLAIAVPAKSIYDVAAPGRIISRKSGCELRYRPFEGASRHLGGILLISNG---KFRAVMNIKYDEVIRSELISMGISFKFESSEDPANPAASAAADLLEKC----                                | 299 |
| HVO_0662      | IPEVLSNLAIAVPAKSIYDVAAPGRIISRKSGCELRYRPFEGASRHLGGILLISNG---KFRAVMNIKYDEVIRSELISMGISFKFESSEDPANPAASAAADLLEKC----                                | 299 |
| HFX_0632      | IPEVLSNLAIAVPAKSIYDVAAPGRIISRKSGCELRYRPFEGASRHLGGILLISNG---KFRAVMNIKYDEVIRSELISMGISFKFESSEDPANPAASAAADLLEKC----                                | 299 |
| Hbor_25480    | IPEVLSNLAIAVPAKSIYDVAAPGRIISRKSGCELRYRPFEGASRHLGGILLISNG---KFRAVMNIKYDEVIRSELISMGISFKFESSEDPANPAASAAADLLEKC----                                | 301 |
| PH0716        | IPEVLSNLAIAVPAKSIYDVAAPGRIISRKSGCELRYRPFEGASRHLGGILLISNG---KFRAVMNIKYDEVIRSELISMGISFKFESSEDPANPAASAAADLLEKC----                                | 294 |
| PAB0877       | IPEVLSNLAIAVPAKSIYDVAAPGRIISRKSGCELRYRPFEGASRHLGGILLISNG---KFRAVMNIKYDEVIRSELISMGISFKFESSEDPANPAASAAADLLEKC----                                | 294 |
| PNA2_1361     | IPEVLSNLAIAVPAKSIYDVAAPGRIISRKSGCELRYRPFEGASRHLGGILLISNG---KFRAVMNIKYDEVIRSELISMGISFKFESSEDPANPAASAAADLLEKC----                                | 294 |
| Py04_0745     | IPEVLSNLAIAVPAKSIYDVAAPGRIISRKSGCELRYRPFEGASRHLGGILLISNG---KFRAVMNIKYDEVIRSELISMGISFKFESSEDPANPAASAAADLLEKC----                                | 295 |
| PF0601        | IPEVLSNLAIAVPAKSIYDVAAPGRIISRKSGCELRYRPFEGASRHLGGILLISNG---KFRAVMNIKYDEVIRSELISMGISFKFESSEDPANPAASAAADLLEKC----                                | 293 |
| PYCH_07480    | IPEVLSNLAIAVPAKSIYDVAAPGRIISRKSGCELRYRPFEGASRHLGGILLISNG---KFRAVMNIKYDEVIRSELISMGISFKFESSEDPANPAASAAADLLEKC----                                | 294 |
| TS1B_0198     | IPEVLSNLAIAVPAKSIYDVAAPGRIISRKSGCELRYRPFEGASRHLGGILLISNG---KFRAVMNIKYDEVIRSELISMGISFKFESSEDPANPAASAAADLLEKC----                                | 296 |
| OCC_09391     | IPEVLSNLAIAVPAKSIYDVAAPGRIISRKSGCELRYRPFEGASRHLGGILLISNG---KFRAVMNIKYDEVIRSELISMGISFKFESSEDPANPAASAAADLLEKC----                                | 296 |
| TERMP_01433   | IPEVLSNLAIAVPAKSIYDVAAPGRIISRKSGCELRYRPFEGASRHLGGILLISNG---KFRAVMNIKYDEVIRSELISMGISFKFESSEDPANPAASAAADLLEKC----                                | 299 |
| TOÑ_1436      | IPEVLSNLAIAVPAKSIYDVAAPGRIISRKSGCELRYRPFEGASRHLGGILLISNG---KFRAVMNIKYDEVIRSELISMGISFKFESSEDPANPAASAAADLLEKC----                                | 294 |
| GQS_08390     | IPEVLSNLAIAVPAKSIYDVAAPGRIISRKSGCELRYRPFEGASRHLGGILLISNG---KFRAVMNIKYDEVIRSELISMGISFKFESSEDPANPAASAAADLLEKC----                                | 294 |
| CL1_1295      | IPEVLSNLAIAVPAKSIYDVAAPGRIISRKSGCELRYRPFEGASRHLGGILLISNG---KFRAVMNIKYDEVIRSELISMGISFKFESSEDPANPAASAAADLLEKC----                                | 294 |
| TGAM_2087     | IPEVLSNLAIAVPAKSIYDVAAPGRIISRKSGCELRYRPFEGASRHLGGILLISNG---KFRAVMNIKYDEVIRSELISMGISFKFESSEDPANPAASAAADLLEKC----                                | 293 |
| TAM4_328      | IPEVLSNLAIAVPAKSIYDVAAPGRIISRKSGCELRYRPFEGASRHLGGILLISNG---KFRAVMNIKYDEVIRSELISMGISFKFESSEDPANPAASAAADLLEKC----                                | 293 |
| TKZ197        | IPEVLSNLAIAVPAKSIYDVAAPGRIISRKSGCELRYRPFEGASRHLGGILLISNG---KFRAVMNIKYDEVIRSELISMGISFKFESSEDPANPAASAAADLLEKC----                                | 293 |



**Table S1. (A) Distribution of thiamin biosynthesis / salvage and ThiR genes in archaeal genomes.**

| Genomes / Lineage (number of genomes per lineage)    | Pheno-type <sup>1</sup> | Thiamine Repressor ThiR <sup>2</sup> | Thiamine biosynthesis and salvage enzymes <sup>2</sup> |                |             |             |             |               |                           |             |
|------------------------------------------------------|-------------------------|--------------------------------------|--------------------------------------------------------|----------------|-------------|-------------|-------------|---------------|---------------------------|-------------|
|                                                      |                         |                                      | ThiC                                                   | Thi4           | ThiM        | ThiE        | ThiD        | ThiDN         | TenA                      |             |
| <b>Crenarchaeota / Thermoprotei Sulfolobales (8)</b> |                         |                                      | <b>ThiR</b>                                            | <b>ThiC</b>    | <b>Thi4</b> |             |             | <b>ThiDN</b>  | <b>TenA</b>               |             |
| <i>Metallosphaera yellowstonensis</i> MK1*           | Ah&T                    | MetMK1_29690                         | -                                                      | &MetMK1_23630  | -           | -           | -           | MetMK1_11590  | &MetMK1_24350-40          |             |
| <i>Metallosphaera cuprina</i> Ar-4                   | P&T                     | Mcup_0124                            | Mcup_1215                                              | &Mcup_0086     | -           | -           | -           | Mcup_1524     | Mcup_0881                 |             |
| <i>Metallosphaera sedula</i> DSM 5348                | P&T                     | Msed_2166                            | &Msed_0906                                             | &Msed_2221     | -           | -           | -           | Msed_0646     | Msed_1351                 |             |
| <i>Sulfolobus acidocaldarius</i> DSM 639             | P&T                     | Saci_0437                            | &Saci_0137                                             | &Saci_0854     | -           | -           | -           | Saci_0953     | Saci_2283; Saci_1230      |             |
| <i>Sulfolobus islandicus</i> Y.N.15.51               | P&T                     | YN1551_1174                          | YN1551_2484                                            | &YN1551_1140   | -           | -           | -           | YN1551_2791   | &YN1551_2613; YN1551_3080 |             |
| <i>Sulfolobus solfataricus</i> P2                    | P&T                     | SSO0468                              | SSO1941; SSO1324                                       | &SSO0436       | -           | -           | -           | SSO2393       | &SSO2089; SSO2598         |             |
| <i>Sulfolobus tokodaii</i> str. 7                    | P&T                     | ST0179                               | ST1864                                                 | &ST0361        | -           | -           | -           | ST0526        | ST1041; ST1007            |             |
| <i>Acidianus hospitalis</i> W1                       | P&T                     | Ahos_0963                            | &Ahos_1208                                             | &Ahos_0692     | -           | -           | -           | Ahos_2188     | Ahos_2099                 |             |
| <b>Thermoproteales (13)</b>                          |                         |                                      | <b>ThiR</b>                                            | <b>ThiC</b>    | <b>Thi4</b> | <b>ThiM</b> | <b>ThiE</b> | <b>ThiDN</b>  | <b>TenA</b>               |             |
| <i>Caldivirga maquilingensis</i> IC-167              | Ah&T                    | Cmaq_1034                            | -                                                      | &Cmaq_1420     | &Cmaq_0062  | Cmaq_0061   | -           | &Cmaq_0452    | Cmaq_0480                 |             |
| <i>Pyrobaculum aerophilum</i> str. IM2               | P&T                     | PAE2210                              | &PAE0333                                               | &PAE0175       | -           | -           | -           | &PAE2535      | &PAE0170-1                |             |
| <i>Pyrobaculum arsenaticum</i> DSM 13514             | Ah&T                    | Pars_1934                            | -                                                      | Pars_1498      | -           | -           | -           | Pars_0839     | &Pars_2186-7              |             |
| <i>Pyrobaculum caldifontis</i> JCM 11548             | Ah&T                    | Pcal_0941                            | -                                                      | Pcal_1555      | -           | -           | -           | Pcal_0240     | &Pcal_1316; &Pcal_1890    |             |
| <i>Pyrobaculum islandicum</i> DSM 4184               | P&T                     | Pisl_0839                            | &Pisl_1450                                             | &Pisl_1998     | -           | -           | -           | &Pisl_1419    | &Pisl_1975-4              |             |
| <i>Pyrobaculum oguniense</i> TE7                     | P&T                     | Pogu_0189                            | Pogu_2748                                              | Pogu_0708      | -           | -           | -           | Pogu_1494     | &Pogu_2702-01             |             |
| <i>Pyrobaculum</i> sp. 1860                          | Ah&T                    | P186_0445                            | -                                                      | &P186_0936     | -           | -           | -           | P186_2074     | &P186_0930-1              |             |
| <i>Pyrobaculum yellowstonensis</i> WP30              | P&T                     | MSUCoA1_00968                        | &MSUCoA1_00516                                         | &MSUCoA1_02190 | -           | -           | -           | MSUCoA1_02233 | &MSUCoA1_02191-2          |             |
| <i>Thermoproteus neutrophilus</i> V24Sta             | P&T                     | Tneu_1384                            | &Tneu_0530                                             | &Tneu_1052     | -           | -           | -           | &Tneu_1881    | &Tneu_1073-4              |             |
| <i>Thermoproteus tenax</i> Kra 1                     | P&T                     | TTX_0743                             | &TTX_0287                                              | &TTX_0666      | -           | -           | -           | TTX_0857      | TTX_0325-24               |             |
| <i>Thermoproteus uzoniensis</i> 768-20               | Ah&T                    | TUZN_0486                            | -                                                      | &TUZN_0079     | -           | -           | -           | TUZN_0613     | TUZN_0831-30              |             |
| <i>Vulcanisaeta distributa</i> DSM 14429             | P&T                     | Vdis_2360                            | Vdis_0190                                              | &Vdis_2373     | Vdis_0394   | Vdis_1205   | -           | &Vdis_2402    | Vdis_2464; Vdis_0560      |             |
| <i>Vulcanisaeta mouthovskia</i> 768-28               | Ah&T                    | VMUT_0712                            | -                                                      | &VMUT_0723     | VMUT_1232   | VMUT_2053   | -           | &VMUT_0747    | VMUT_0803; VMUT_1030      |             |
| <b>Thermoproteales - Thermofilum (4)</b>             |                         |                                      | <b>ThiR</b>                                            |                |             |             |             |               |                           |             |
| <i>Thermofilum carboxyditrophus</i> 1505             | A&T                     | &TCARB_1341                          | -                                                      | -              | -           | -           | -           | -             | -                         |             |
| <i>Thermofilum pendens</i> Hrk5                      | A&T                     | &Tpen_0069                           | -                                                      | -              | -           | -           | -           | -             | -                         |             |
| <i>Thermofilum</i> sp. 1807-2                        | A&T                     | &MA03_01130                          | -                                                      | -              | -           | -           | -           | -             | -                         |             |
| <i>Thermofilum</i> sp. 1910b                         | A&T                     | &N186_01270                          | -                                                      | -              | -           | -           | -           | -             | -                         |             |
| <b>Desulfurococcales (13)</b>                        |                         |                                      | <b>ThiR</b>                                            | <b>ThiC</b>    | <b>Thi4</b> | <b>ThiM</b> | <b>ThiE</b> | <b>ThiD</b>   | <b>ThiDN</b>              | <b>TenA</b> |
| <i>Aeropyrum camini</i> SY1                          | Ah&T                    | -                                    | -                                                      | ACAM_1344      | -           | -           | -           | ACAM_1502     | ACAM_0495                 |             |
| <i>Aeropyrum pernix</i>                              | Ah&T                    | -                                    | -                                                      | APE_2149       | -           | -           | -           | APE_2400      | APE_0669                  |             |
| <i>Desulfurococcus fermentans</i> DSM 16532          | P&T                     | Desfe_0411                           | &Desfe_0198                                            | &Desfe_0795    | -           | -           | -           | &Desfe_0794   | -                         |             |
| <i>Desulfurococcus kamchatkensis</i> 1221n           | P&T                     | DKAM_0343                            | &DKAM_0122                                             | &DKAM_0713     | -           | -           | -           | &DKAM_0714    | -                         |             |
| <i>Desulfurococcus mucosus</i> DSM 2162              | A&T                     | Desmu_0750                           | -                                                      | -              | -           | -           | -           | Desmu_0544    | -                         |             |
| <i>Hyperthermus butylicus</i> DSM 5456               | P                       | Hbut_0125                            | &Hbut_0289                                             | &Hbut_0253     | -           | -           | -           | Hbut_1459     | -                         |             |
| <i>Ignicoccus hospitalis</i> KIN4/I                  | P                       | -                                    | Igni_0104                                              | Igni_0560      | -           | -           | -           | Igni_0888     | -                         |             |
| <i>Ignisphaera aggregans</i> DSM 17230               | P                       | Igag_0434                            | &Igag_1298                                             | Igag_0295      | -           | -           | -           | &Igag_1669    | -                         |             |
| <i>Pyrolobus fumarii</i> 1                           | P                       | -                                    | Pyrfu_1448                                             | Pyrfu_0366     | -           | -           | -           | Pyrfu_0689    | -                         |             |
| <i>Staphylothermus hellenicus</i> DSM 12710          | Ah&T                    | Shell_1065                           | -                                                      | &Shell_0764    | -           | -           | -           | &Shell_0767   | Shell_0762                |             |
| <i>Staphylothermus marinus</i> F1                    | Ah&T                    | Smar_1383                            | -                                                      | &Smar_0052     | -           | -           | -           | &Smar_0049    | Smar_0054                 |             |

|                                               |      |                        |             |                             |             |             |             |              |                |
|-----------------------------------------------|------|------------------------|-------------|-----------------------------|-------------|-------------|-------------|--------------|----------------|
| <i>Thermogladius cellulolyticus</i> 1633      | P&T  | TCELL_1104             | &TCELL_1013 | &TCELL_1023                 | -           | -           | -           | TCELL_1024   | -              |
| <i>Thermosphaera aggregans</i> DSM 11486      | As&T | Tagg_0649              | -           | -                           | Tagg_0775   | Tagg_0776   | &Tagg_0777  | -            | -              |
| <b>Acidilobales (2)</b>                       |      |                        |             |                             |             |             |             | <b>ThiDN</b> | <b>TenA</b>    |
| <i>Acidilobus saccharovorans</i> 345-15       | A    | -                      | -           | -                           | -           | -           | -           | ASAC_1274    | ASAC_0493      |
| <i>Caldisphaera lagunensis</i> DSM 15908      | A&T  | -                      | -           | -                           | -           | -           | -           | Calag_0858   | Calag_0587     |
| <b>Fervidicoccales (1)</b>                    |      | <b>ThiR</b>            |             | <b>Thi4</b>                 |             |             |             | <b>ThiDN</b> | <b>TenA</b>    |
| <i>Fervidococcus fontis</i> Kam940            | Ah&T | &FFONT_0578            | -           | &FFONT_0392                 | -           | -           | -           | FFONT_0261   | FFONT_0756     |
| <b>Euryarchaeota</b>                          |      |                        |             |                             |             |             |             |              |                |
| <b>Thermococci (15)</b>                       |      | <b>ThiR</b>            | <b>ThiC</b> | <b>Thi4</b>                 | <b>ThiM</b> | <b>ThiE</b> | <b>YjbQ</b> | <b>ThiDN</b> | <b>TenA</b>    |
| <i>Pyrococcus abyssi</i> GE5                  | P&T  | PAB0877                | &PAB1930    | &PAB0536                    | PAB2432     | PAB1645     | PAB0878     | PAB1646      | &PAB1641-2     |
| <i>Pyrococcus furiosus</i> DSM 3638           | P&T  | PF0601                 | &PF1531     | &PF1530                     | PF1335      | PF1334      | PF0680      | PF1333       | &PF1338-7      |
| <i>Pyrococcus horikoshii</i> OT3              | Ah&T | PH0716                 | -           | &PH1357                     | PH1157      | PH1156      | PH0713      | PH1155       | &PH1161-0      |
| <i>Pyrococcus</i> sp. NA2                     | P    | PNA2_1361              | &PNA2_0094  | &PNA2_1941;<br>&PNA2_1583   | PNA2_1766   | PNA2_1765   | PNA2_1360   | PNA2_1764    | &PNA2_1769-8   |
| <i>Pyrococcus</i> sp. ST04                    | Ah&T | Py04_0745              | -           | &PNA2_1941;<br>&PNA2_1583   | Py04_0937   | Py04_0936   | Py04_0747   | Py04_0935    | &Py04_0940-39  |
| <i>Pyrococcus yayanosii</i> CH1               | P&T  | PYCH_07480             | &PYCH_06250 | &PYCH_06240;<br>&PYCH_08650 | -           | -           | PYCH_07470  | PYCH_04500   | -              |
| <i>Thermococcus barophilus</i> MP             | As&T | &TERMP_01433           | -           | -                           | TERMP_00506 | TERMP_00507 | TERMP_01431 | TERMP_00508  | -              |
| <i>Thermococcus gammatolerans</i> EJ3         | P&T  | TGAM_2087              | &TGAM_1269  | &TGAM_1270                  | -           | -           | TGAM_2086   | TGAM_1271    | -              |
| <i>Thermococcus kodakaraensis</i> DSM 3638    | P&T  | &TK2197                | &TK0433     | &TK0434                     | -           | -           | TK2198      | TK0435       | -              |
| <i>Thermococcus litoralis</i> DSM 5473        | P&T  | &OCC_09391             | &OCC_06561  | &OCC_06556                  | OCC_04979   | OCC_04974   | OCC_09401   | OCC_04964    | -              |
| <i>Thermococcus onnurineus</i> NA1            | A&T  | &TON_1436              | -           | -                           | -           | -           | TON_1434    | -            | -              |
| <i>Thermococcus sibiricus</i> MM 739          | As&T | &TSIB_0198             | -           | -                           | TSIB_0465   | TSIB_0464   | TSIB_0200   | TSIB_0462    | TSIB_0466      |
| <i>Thermococcus</i> sp. 4557                  | P&T  | &GQS_08390             | &GQS_02010  | &GQS_02015                  | -           | -           | GQS_08395   | GQS_02020    | -              |
| <i>Thermococcus</i> sp. AM4                   | A&T  | TAM4_328               | -           | -                           | -           | -           | TAM4_136    | -            | -              |
| <i>Thermococcus</i> sp. CL1                   | P&T  | &CL1_1295              | &CL1_0038   | &CL1_0036                   | -           | -           | CL1_1296    | CL1_0035     | -              |
| <b>Halobacteria (17)</b>                      |      | <b>ThiR</b>            | <b>ThiC</b> | <b>Thi4</b>                 | <b>ThiM</b> | <b>ThiE</b> | <b>ThiD</b> | <b>ThiDN</b> | <b>TenA</b>    |
| <i>Haloarcula hispanica</i> ATCC 33960        | P&T  | HAH_2305; HAH_2294     | &HAH_1784   | &HAH_2313                   | -           | HAH_2625    | -           | HAH_2882     | &HAH_2295-6    |
| <i>Haloarcula marismortui</i> ATCC 43049      | P&T  | rrnAC1777; rrnAC1764   | &rrnAC1182  | &rrnAC1782                  | -           | rrnAC2143   | -           | rrnAC2449    | &rrnAC1765-7   |
| <i>Halobacterium</i> sp. NRC-1                | P&T  | VNG0247C               | &VNG0715G   | &VNG2604G                   | -           | -           | -           | VNG2606G     | -              |
| <i>Haloferax mediterranei</i> ATCC 33500      | P&T  | HFX_0632               | &HFX_2195   | &HFX_0634                   | HFX_2684    | HFX_2685    | HFX_2683    | -            | &HFX_5296-5    |
| <i>Haloferax volcanii</i> DS2                 | P&T  | HVO_0662               | &HVO_2154   | &HVO_0665                   | HVO_2667    | HVO_2668    | HVO_2666    | -            | HVO_B0381-80   |
| <i>Halo geometricum borinquense</i> DSM 11551 | P&T  | Hbor_25480             | &Hbor_14920 | &Hbor_25460                 | Hbor_34630  | Hbor_34620  | Hbor_34650  | -            | &Hbor_30560-70 |
| <i>Halomicrobium mukohataei</i> DSM 12286     | P&T  | Hmuk_1352; Hmuk_0022   | &Hmuk_2297  | &Hmuk_0002                  | -           | Hmuk_0403   | -           | Hmuk_0364    | -              |
| <i>Halopiger xanaduensis</i> SH-6             | P&T  | Halxa_0732; Halxa_2856 | &Halxa_3896 | &Halxa_2863                 | Halxa_1353  | Halxa_1354  | -           | Halxa_2106   | &Halxa_2795    |
| <i>Haloquadratum walsbyi</i> DSM 16790        | Ah&T | HQ1277A                | -           | &HQ1276A                    | HQ2656A     | HQ2655A     | HQ2657A     | -            | &HQ2369A       |
| <i>Halorhabdus utahensis</i> DSM 12940        | P&T  | Huta_2715; Huta_2411   | &Huta_2472  | &Huta_2718                  | -           | Huta_1463   | -           | Huta_0491    | &Huta_0684-5   |
| <i>Halorubrum lacusprofundi</i> ATCC 49239    | Ah&T | Hlac_0446              | -           | &Hlac_2980                  | -           | -           | -           | Hlac_2988    | Hlac_2987-6    |
| <i>Haloterrigena turkmenica</i> DSM 5511      | P&T  | Htur_1469; Htur_2542   | &Htur_1332  | &Htur_1462                  | Htur_0247   | Htur_0246   | -           | Htur_3232    | Htur_2707      |
| <i>Halovivax ruber</i> XH-70                  | P&T  | Halru_1158             | &Halru_0933 | &Halru_1150                 | Halru_1513  | Halru_1512  | Halru_0514  | -            | Halru_0039     |
| <i>Natrialba magadii</i> ATCC 43099           | P&T  | Nmag_0434; Nmag_2413   | &Nmag_2593  | &Nmag_2419                  | Nmag_1810   | Nmag_1811   | -           | Nmag_1282    | Nmag_0869      |
| <i>Natrinema pellirubrum</i> DSM 15624        | P&T  | Natpe_1684; Natpe_2824 | &Natpe_3081 | &Natpe_2830                 | Natpe_3728  | &Natpe_3729 | -           | Natpe_0691   | -              |
| <i>Natrinema</i> sp. J7-2                     | P&T  | NJ7G_1102; NJ7G_3692   | &NJ7G_3772  | &NJ7G_3680                  | NJ7G_0298   | &NJ7G_0299  | -           | NJ7G_2232    | &NJ7G_3269     |
| <i>Natronomonas pharaonis</i> DSM 2160        | P    | NP5168A                | &NP2210A    | &NP5174A                    | NP4052A     | &NP4054A    | -           | NP0546A      | NP4082A-80A    |

<sup>1</sup> Predicted TBP phenotypes: P, B1 prototroph; A, B1 auxotroph, As, B1 auxotroph with HMP/HEP precursor salvage; Ah, HMP auxotroph; T, B1/precursor transporter is present.

<sup>2</sup> Predicted ThiR-regulated genes are marked in red, genes that are preceded by candidate ThiR-sites are marked with '&'

**Table S1. (B) Distribution of thiamin-related transporters, ThiL and ThiR genes in archaeal genomes.**

| Genomes / Lineage (number of genomes per lineage) | Pheno-type <sup>1</sup> | Thiamine Repressor ThiR <sup>2</sup> | Thiamine phosphate kinase ThiL | Uptake transporters for thiamine and its precursors <sup>2</sup> |                 |                 |
|---------------------------------------------------|-------------------------|--------------------------------------|--------------------------------|------------------------------------------------------------------|-----------------|-----------------|
|                                                   |                         |                                      |                                | B1 / HMP transporters                                            | HMP transporter | HET transporter |
| <b>Crenarchaeota / Thermoprotei</b>               |                         | <b>ThiR</b>                          | <b>ThiL</b>                    | <b>ThiT</b>                                                      |                 |                 |
| <b>Sulfolobales (8)</b>                           |                         |                                      |                                |                                                                  |                 |                 |
| <i>Metallosphaera yellowstonensis</i> MK1*        | Ah&T                    | MetMK1_29690                         | MetMK1_22900                   | &MetMK1_19590                                                    | -               | -               |
| <i>Metallosphaera cuprina</i> Ar-4                | P&T                     | Mcup_0124                            | Mcup_0019                      | Mcup_1817                                                        | -               | -               |
| <i>Metallosphaera sedula</i> DSM 5348             | P&T                     | Msed_2166                            | Msed_0019                      | Msed_0254                                                        | -               | -               |
| <i>Sulfolobus acidocaldarius</i> DSM 639          | P&T                     | Saci_0437                            | Saci_0704                      | &Saci_2110                                                       | -               | -               |
| <i>Sulfolobus islandicus</i> Y.N.15.51            | P&T                     | YN1551_1174                          | YN1551_0944                    | &YN1551_2514                                                     | -               | -               |
| <i>Sulfolobus solfataricus</i> P2                 | P&T                     | SSO0468                              | SSO0237                        | &SSO1593                                                         | -               | -               |
| <i>Sulfolobus tokodaii</i> str. 7                 | P&T                     | ST0179                               | ST0287                         | &ST1132                                                          | -               | -               |
| <i>Acidianus hospitalis</i> W1                    | P&T                     | Ahos_0963                            | Ahos_0762                      | &Ahos_0145                                                       | -               | -               |
| <b>Thermoproteales (13)</b>                       |                         | <b>ThiR</b>                          | <b>ThiL</b>                    | <b>ThiT</b>                                                      |                 |                 |
| <i>Caldivirga maquilingensis</i> IC-167           | Ah&T                    | Cmaq_1034                            | Cmaq_1646                      | Cmaq_1199 , &Cmaq_0759                                           | -               | -               |
| <i>Pyrobaculum aerophilum</i> str. IM2            | P&T                     | PAE2210                              | PAE1022                        | &PAE0176                                                         | -               | -               |
| <i>Pyrobaculum arsenaticum</i> DSM 13514          | Ah&T                    | Pars_1934                            | Pars_0185                      | &Pars_2195                                                       | -               | -               |
| <i>Pyrobaculum caldifontis</i> JCM 11548          | Ah&T                    | Pcal_0941                            | Pcal_0657*                     | &Pcal_0348                                                       | -               | -               |
| <i>Pyrobaculum islandicum</i> DSM 4184            | P&T                     | Pisl_0839                            | Pisl_1202                      | &Pisl_1973                                                       | -               | -               |
| <i>Pyrobaculum oguniense</i> TE7                  | P&T                     | Pogu_0189                            | Pogu_2294                      | &Pogu_2693                                                       | -               | -               |
| <i>Pyrobaculum</i> sp. 1860                       | Ah&T                    | P186_0445                            | P186_2443                      | &P186_0937                                                       | -               | -               |
| <i>Pyrobaculum yellowstonensis</i> WP30           | P&T                     | MSUCoA1_00968                        | MSUCoA1_00352                  | &MSUCoA1_02193                                                   | -               | -               |
| <i>Thermoproteus neutrophilus</i> V24Sta          | P&T                     | Tneu_1384                            | Tneu_0170                      | &Tneu_1075                                                       | -               | -               |
| <i>Thermoproteus tenax</i> Kra 1                  | P&T                     | TTX_0743                             | TTX_2042                       | TTX_1146                                                         | -               | -               |
| <i>Thermoproteus uzoniensis</i> 768-20            | Ah&T                    | TUZN_0486                            | TUZN_1441                      | TUZN_0889                                                        | -               | -               |
| <i>Vulcanisaeta distributa</i> DSM 14429          | P&T                     | Vdis_2360                            | Vdis_0764                      | &Vdis_2303, &Vdis_2247                                           | -               | -               |
| <i>Vulcanisaeta mouthovskia</i> 768-28            | Ah&T                    | VMUT_0712                            | VMUT_1612                      | &VMUT_0613                                                       | -               | -               |
| <b>Thermoproteales - Thermofilum (4)</b>          |                         | <b>ThiR</b>                          | <b>ThiL</b>                    | <b>YkoEDC</b>                                                    |                 |                 |
| <i>Thermofilum carboxyditrophus</i> 1505          | A&T                     | &TCARB_1341                          | TCARB_1738                     | &TCARB_1340-38                                                   | -               | -               |
| <i>Thermofilum pendens</i> Hrk5                   | A&T                     | &Tpen_0069                           | Tpen_0476                      | &Tpen_0068-66                                                    | -               | -               |
| <i>Thermofilum</i> sp. 1807-2                     | A&T                     | &MA03_01130                          | MA03_06765                     | &MA03_01135-45                                                   | -               | -               |
| <i>Thermofilum</i> sp. 1910b                      | A&T                     | &N186_01270                          | N186_03355                     | &N186_01265-55                                                   | -               | -               |
| <b>Desulfurococcales (13)</b>                     |                         | <b>ThiR</b>                          | <b>ThiL</b>                    | <b>YkoEDC</b>                                                    | <b>CytX</b>     |                 |
| <i>Aeropyrum camini</i> SY1                       | Ah&T                    | -                                    | ACAM_0179                      | ACAM_1349; ACAM_1350-1                                           | -               | -               |
| <i>Aeropyrum pernix</i>                           | Ah&T                    | -                                    | APE_0235                       | APE_2154-5^                                                      | -               | -               |
| <i>Desulfurococcus fermentans</i> DSM 16532       | P&T                     | Desfe_0411                           | Desfe_0567                     | &Desfe_0090; &Desfe_0187-6                                       | -               | -               |

|                                             |      |                      |             |                                        |              |             |
|---------------------------------------------|------|----------------------|-------------|----------------------------------------|--------------|-------------|
| <i>Desulfurococcus kamchatkensis</i> 1221n  | P&T  | DKAM_0343            | DKAM_0574   | &DKAM_1465; &DKAM_0109-8               | -            | -           |
| <i>Desulfurococcus mucosus</i> DSM 2162     | A&T  | Desmu_0750           | Desmu_1220  | &Desmu_0176; &Desmu_0257-6             | &Desmu_0542  | -           |
| <i>Hyperthermus butylicus</i> DSM 5456      | P    | Hbut_0125            | Hbut_0793   | -                                      | -            | -           |
| <i>Ignicoccus hospitalis</i> KIN4/I         | P    | -                    | Igni_0219   | -                                      | -            | -           |
| <i>Ignisphaera aggregans</i> DSM 17230      | P    | Igag_0434            | Igag_1192   | -                                      | -            | -           |
| <i>Pyrolobus fumarii</i> 1                  | P    | -                    | Pyrfu_1719  | -                                      | -            | -           |
| <i>Staphylothermus hellenicus</i> DSM 12710 | Ah&T | Shell_1065           | Shell_0827  | &Shell_0763; &Shell_0766-5             | &Shell_0907  | -           |
| <i>Staphylothermus marinus</i> F1           | Ah&T | Smar_1383            | Smar_1576   | &Smar_0053; &Smar_0050-1               | -            | -           |
| <i>Thermogladius cellulolyticus</i> 1633    | P&T  | TCELL_1104           | TCELL_1258  | &TCELL_0952; &TCELL_0944-5             | -            | -           |
| <i>Thermosphaera aggregans</i> DSM 11486    | As&T | Tagg_0649            | Tagg_0467   | &Tagg_0461; &Tagg_0459-60              | -            | -           |
| <b>Acidilobales (2)</b>                     |      |                      | <b>ThiI</b> | <b>ThiT</b>                            |              |             |
| <i>Acidilobus saccharovorans</i> 345-15     | A    | -                    | ASAC_1266   | -                                      | -            | -           |
| <i>Caldisphaera lagunensis</i> DSM 15908    | A&T  | -                    | Calag_0867  | Calag_0174                             | -            | -           |
| <b>Fervidicoccales (1)</b>                  |      | <b>ThiR</b>          | <b>ThiI</b> | <b>YkoEDC</b>                          |              |             |
| <i>Fervidococcus fontis</i> Kam940          | Ah&T | &FFONT_0578          | FFONT_0963  | &FFONT_0579; &FFONT_0581-0             | -            | -           |
| <b>Euryarchaeota</b>                        |      |                      |             |                                        |              |             |
| <b>Thermococci (15)</b>                     |      | <b>ThiR</b>          | <b>ThiI</b> | <b>ThiBPQ</b>                          | <b>CytX</b>  | <b>ThiW</b> |
| <i>Pyrococcus abyssi</i> GE5                | P&T  | PAB0877              | PAB2358     | &PAB1835; PAB0543-45                   | PAB1643      | -           |
| <i>Pyrococcus furiosus</i> DSM 3638         | P&T  | PF0601               | PF1877      | &PF1751; &PF1748-50. PF1518; PF1520-19 | PF1336       | -           |
| <i>Pyrococcus horikoshii</i> OT3            | Ah&T | PH0716               | PH1833      | &PH1349; PH1352-50                     | PH1159       | -           |
| <i>Pyrococcus</i> sp. NA2                   | P    | PNA2_1361            | PNA2_0432   | -                                      | PNA2_1767    | -           |
| <i>Pyrococcus</i> sp. ST04                  | Ah&T | Py04_0745            | Py04_1764   | Py04_1237; Py04_1235-6                 | Py04_0938    | -           |
| <i>Pyrococcus yayanosii</i> CH1             | P&T  | PYCH_07480           | PYCH_00820  | PYCH_10760; PYCH_10780-70              | -            | -           |
| <i>Thermococcus barophilus</i> MP           | As&T | &TERMP_01433         | TERMP_00381 | &TERMP_01742; &TERMP_01606-07          | &TERMP_00505 | -           |
| <i>Thermococcus gammatolerans</i> EJ3       | P&T  | TGAM_2087            | TGAM_0436   | &TGAM_1706; TGAM_1704-5                | -            | -           |
| <i>Thermococcus kodakaraensis</i> DSM 3638  | P&T  | &TK2197              | TK0890      | TK0757; &TK0159-8                      | -            | -           |
| <i>Thermococcus litoralis</i> DSM 5473      | P&T  | &OCC_09391           | OCC_04465   | &OCC_11612; OCC_11622-17               | &OCC_04984   | OCC_04969   |
| <i>Thermococcus onnurineus</i> NA1          | A&T  | &TON_1436            | TON_0419    | &TON_0963; &TON_1959-8                 | -            | -           |
| <i>Thermococcus sibiricus</i> MM 739        | As&T | &TSIB_0198           | TSIB_0584   | &TSIB_0369; TSIB_0367-8                | &TSIB_0467   | TSIB_0463   |
| <i>Thermococcus</i> sp. 4557                | P&T  | &GQS_08390           | GQS_03115   | &GQS_10685; &GQS_05315-20              | -            | -           |
| <i>Thermococcus</i> sp. AM4                 | A&T  | TAM4_328             | TAM4_510    | &TAM4_1850; TAM4_1694-35               | -            | -           |
| <i>Thermococcus</i> sp. CL1                 | P&T  | &CL1_1295            | CL1_0270    | CL1_1711; &CL1_0708-9                  | -            | -           |
| <b>Halobacteria (17)</b>                    |      | <b>ThiR</b>          | <b>ThiI</b> | <b>ThiBPQ</b>                          | <b>ThiV</b>  |             |
| <i>Haloarcula hispanica</i> ATCC 33960      | P&T  | HAH_2305; HAH_2294   | HAH_0441    | &HAH_0897-95                           | HAH_2297     | -           |
| <i>Haloarcula marismortui</i> ATCC 43049    | P&T  | rrnAC1777; rrnAC1764 | rrnAC3177   | &rrnAC0147-45                          | rrnAC1769    | -           |
| <i>Halobacterium</i> sp. NRC-1              | P&T  | VNG0247C             | VNG2011G    | &VNG2395-97C; VNG1879G                 | -            | -           |



|                                              |      |                        |            |                            |            |   |
|----------------------------------------------|------|------------------------|------------|----------------------------|------------|---|
| <i>Haloferax mediterranei</i> ATCC 33500     | P&T  | HFX_0632               | HFX_1943   | &HFX_0021-19               | HFX_5294   | - |
| <i>Haloferax volcanii</i> DS2                | P&T  | HVO_0662               | HVO_1861   | &HVO_0022-20               | HVO_B0379  | - |
| <i>Halogeometricum borinquense</i> DSM 11551 | P&T  | Hbor_25480             | Hbor_04620 | &Hbor_02000-10; Hbor_18130 | Hbor_30580 | - |
| <i>Halomicrobium mukohataei</i> DSM 12286    | P&T  | Hmuk_1352; Hmuk_0022   | Hmuk_1297  | Hmuk_1933-35               | -          | - |
| <i>Halopiger xanaduensis</i> SH-6            | P&T  | Halxa_0732; Halxa_2856 | Halxa_3467 | &Halxa_0707-05; Halxa_1431 | -          | - |
| <i>Haloquadratum walsbyi</i> DSM 16790       | Ah&T | HQ1277A                | HQ1102A    | -                          | HQ2370A    | - |
| <i>Halorhabdus utahensis</i> DSM 12940       | P&T  | Huta_2715; Huta_2411   | Huta_1979  | &Huta_0388-90              | Huta_0686  | - |
| <i>Halorubrum lacusprofundi</i> ATCC 49239   | Ah&T | Hlac_0446              | Hlac_2151  | &Hlac_2697-95              | -          | - |
| <i>Haloterrigena turkmenica</i> DSM 5511     | P&T  | Htur_1469; Htur_2542   | Htur_3484  | &Htur_2516-14              | -          | - |
| <i>Halovivax ruber</i> XH-70                 | P&T  | Halru_1158             | Halru_0115 | &Halru_0146-48             | -          | - |
| <i>Natrialba magadii</i> ATCC 43099          | P&T  | Nmag_0434; Nmag_2413   | Nmag_1515  | &Nmag_0460-62; Nmag_1940   | -          | - |
| <i>Natrinema pellirubrum</i> DSM 15624       | P&T  | Natpe_1684; Natpe_2824 | Natpe_0446 | &Natpe_3863-65             | -          | - |
| <i>Natrinema</i> sp. J7-2                    | P&T  | NJ7G_1102; NJ7G_3692   | NJ7G_2637  | &NJ7G_0450-52              | -          | - |
| <i>Natronomonas pharaonis</i> DSM 2160       | P    | NP5168A                | NP2280A    | -                          | -          | - |

<sup>1</sup> Predicted TBP phenotypes: P, B1 prototroph; A, B1 auxotroph, As, B1 auxotroph with HMP/HEP precursor salvage; Ah, HMP auxotroph; T, B1/precursor tr

<sup>2</sup> Predicted ThiR-regulated genes are marked in red, genes that are preceded by candidate ThiR-sites are marked with '&'

**Table S2. Predicted ThiR-binding sites and reconstructed regulons in archaeal genomes.**

| Genome / Lineage (Motif type)             | thiR gene locus_tag  | Target operon <sup>1</sup> | First gene locus tag | ThiR-binding site and consensus <sup>2</sup> |             |                      | Distance between tandem ThiR boxes | TSS position <sup>5</sup> |
|-------------------------------------------|----------------------|----------------------------|----------------------|----------------------------------------------|-------------|----------------------|------------------------------------|---------------------------|
|                                           |                      |                            |                      | Position <sup>3</sup>                        | Score       | Sequence             |                                    |                           |
| <b>Sulfolobales (Motif-I)</b>             |                      |                            |                      | <b>Threshold=5.1</b>                         |             |                      | <b>nwTATAAnnnnnTTATAwn</b>         |                           |
| <i>Metallosphaera yellowstonensis</i> MK1 | MetMK1DRAFT_00029690 | <i>thi4</i>                | MetMK1DRAFT_00023630 | -41                                          | 5.89        | taTATAAcTAgTTTATAAG  | validated                          |                           |
|                                           |                      | <i>thiT</i>                | MetMK1DRAFT_00019590 | -42                                          | 5.27        | taaATAAgTaAgTTTATAAc | validated                          |                           |
|                                           |                      | <i>tenA1-tenA2</i>         | MetMK1DRAFT_00024350 | -39                                          | <u>5.09</u> | aTTATAAaTgATTTATAc   | validated                          |                           |
| <i>Metallosphaera sedula</i> DSM 5348     | Msed_2166            | <i>thi4</i>                | Msed_2221            | -43                                          | 5.98        | tTTATAAcTTAgTTTATAAG |                                    |                           |
|                                           |                      | <i>thiC</i>                | Msed_0906            | -17                                          | 5.75        | CTTATAAcTTAcTTTATAAT |                                    |                           |
| <i>Metallosphaera cuprina</i> Ar-4        | Mcup_0124            | <i>thi4</i>                | Mcup_0086            | -41                                          | 5.82        | taTATAAcTAgCTTATAAG  |                                    |                           |
| <i>Sulfolobus acidocaldarius</i> DSM 639  | Saci_0437            | <i>thi4</i>                | Saci_0854            | -37                                          | 5.6         | CaTATAAgTgAgTTTATAAc |                                    |                           |
|                                           |                      | <i>thiT</i>                | Saci_2110            | -41                                          | 5.21        | aaTATAAcTaAcTTTATAAc |                                    |                           |
|                                           |                      | <i>thiC</i>                | Saci_0137            | -31                                          | 5.18        | tTTATAAcTAgTTTATtga  |                                    |                           |
| <i>Sulfolobus solfataricus</i> P2         | SSO0468              | <i>thi4</i>                | SSO0436              | -40                                          | 5.66        | taTaaAaGTTAATTATAAG  |                                    | 0 bp                      |
|                                           |                      | <i>thiT</i>                | SSO1593              | -41                                          | 5.25        | aaaATAAgTgAcTTTATAAG |                                    | 0 bp                      |
| <i>Sulfolobus tenA</i>                    | SSO2089              | <i>thi4</i>                | SSO2089              | -40                                          | 5.51        | gTTATAAaTAATTATAAT   |                                    | 0 bp                      |
|                                           |                      | <i>thiT</i>                | ST0361               | -32                                          | 5.39        | taTATtAgcTAgTTTATAAT |                                    |                           |
| <i>Sulfolobus tokodaii</i> str. 7         | ST0179               | <i>thi4</i>                | ST0361               | -32                                          | 5.39        | taTATtAgcTAgTTTATAAT |                                    |                           |
|                                           |                      | <i>thiT</i>                | ST1132               | -41                                          | 5.52        | CaTATAAgTaggTTTATAAG |                                    |                           |
| <i>Sulfolobus islandicus</i> Y.N.15.51    | YN1551_1174          | <i>thi4</i>                | YN1551_1140          | -40                                          | 5.66        | taTaaAaGTTAATTATAAG  |                                    |                           |
|                                           |                      | <i>thiT</i>                | YN1551_2514          | -41                                          | 5.25        | aaaATAAgTgAcTTTATAAG |                                    |                           |
|                                           |                      | <i>tenA</i>                | YN1551_2613          | -40                                          | 5.4         | CTTATAAaTgATTTATAAT  |                                    |                           |
| <i>Acidianus hospitalis</i> W1            | Ahos_0963            | <i>thi4</i>                | Ahos_0692            | -43                                          | 5.91        | taTATAAcTTAgTTTATAAG |                                    |                           |
|                                           |                      | <i>thiT</i>                | Ahos_0145            | -41                                          | 5.8         | CTTATAAgTaAgTTTATAAT |                                    |                           |
|                                           |                      | <i>thiC</i>                | Ahos_1208            | -20                                          | 5.14        | CTTATtAaGtAcTTTATAa  |                                    |                           |
| <b>Thermoproteales (Motif-II)</b>         |                      |                            |                      | <b>Threshold=4.5</b>                         |             |                      | <b>AWAAnnnWTWT</b>                 |                           |
| <i>Pyrobaculum aerophilum</i> str. IM2    | PAE2210              | <i>tenA1-tenA2</i>         | PAE0170              | -34                                          | 5.29        | ATAAAATTTTTAT        | 33 nt                              |                           |
|                                           |                      | <i>thi4</i>                | PAE0175              | -65                                          | 4.79        | ATAAtAaTTtT          |                                    |                           |
|                                           |                      | <i>thiT</i>                | PAE0176              | -32                                          | 5.16        | ATAATTTTTAT          |                                    |                           |
|                                           |                      | <i>thi(DN)</i>             | PAE2535              | -37                                          | 5.12        | ATAAAATTTTTT         |                                    |                           |
|                                           |                      | <i>thiC</i>                | PAE0333              | -17                                          | <u>4.33</u> | AaAActAaTTTAT        |                                    |                           |
| <i>Pyrobaculum</i> sp. 1860               | P186_0445            | <i>tenA1-tenA2</i>         | P186_0930            | -34                                          | 4.62        | ATAAcgTTTTAT         | 34 nt                              |                           |
|                                           |                      | <i>thi4</i>                | P186_0936            | -66                                          | 4.79        | ATAAtAaTTtT          |                                    |                           |
|                                           |                      | <i>thiT</i>                | P186_0937            | -62                                          | 4.88        | ATAAAACaTTAT         |                                    |                           |
|                                           |                      |                            |                      | -28                                          | 4.79        | AaAAATTTATTAT        |                                    |                           |
| <i>Pyrobaculum oguniense</i> TE7          | Pogu_0189            | <i>tenA1-tenA2</i>         | Pogu_2702            | -32                                          | 5.01        | ATAAAGTTTTAT         |                                    |                           |
| <i>Pyrobaculum arsenaticum</i> DSM 13514  | Pars_1934            | <i>thiT</i>                | Pars_2693            | -33                                          | <u>4.16</u> | ATAAATTaTTaAT        |                                    |                           |
|                                           |                      | <i>tenA1-tenA2</i>         | Pars_2186            | -34                                          | 5.01        | ATAAAGTTTTAT         |                                    |                           |
| <i>Pyrobaculum calidifontis</i> JCM 11548 | Pcal_0941            | <i>thiT</i>                | Pars_2195            | -34                                          | <u>4.36</u> | ATAAAATaTTaAT        |                                    |                           |
|                                           |                      | <i>tenA2</i>               | Pcal_0348            | -32                                          | 4.68        | ATAAtgTaTTTAT        |                                    |                           |
| <i>Pyrobaculum islandicum</i> DSM 4184    | Pisl_0839            | <i>tenA1</i>               | Pcal_1316            | -34                                          | <u>4.15</u> | tTAAtgTTTTAT         |                                    |                           |
|                                           |                      | <i>thi(DN)</i>             | Pcal_1890            | -32                                          | <u>4.17</u> | AaAAAcTTTTAT         |                                    |                           |
|                                           |                      | <i>thiC</i>                | Pisl_1419            | -10                                          | 4.73        | AaAAATTgTTAT         |                                    |                           |
| <i>Pyrobaculum yellowstonensis</i> WP30   | MSUCoA1_00968        | <i>thiC</i>                | Pisl_1450            | -32                                          | 4.66        | AaAAtcTTTTAT         |                                    |                           |
|                                           |                      | <i>thiT</i>                | Pisl_1973            | -34                                          | 5.12        | ATAAAATTTTTT         |                                    |                           |
|                                           |                      | <i>tenA1-tenA2</i>         | Pisl_1974            | -34                                          | 5.12        | AaAAATTTTTAT         |                                    |                           |
|                                           |                      | <i>thi4</i>                | Pisl_1998            | 2                                            | <u>4.44</u> | AaAAGaTTTAT          |                                    |                           |
|                                           |                      | <i>thiC</i>                | MSUCoA1_00516        | -32                                          | 5.16        | ATAAtTTTTAT          |                                    |                           |
| <i>Thermoproteus neutrophilus</i> V24Sta  | Tneu_1384            | <i>thi4</i>                | MSUCoA1_02190        | -32                                          | 4.96        | ATAAtaTTTAT          | 16 nt                              |                           |
|                                           |                      | <i>tenA1-tenA2</i>         | MSUCoA1_02192        | -48                                          | 4.79        | ATAAAATaTTtT         |                                    |                           |
|                                           |                      | <i>thiT</i>                | MSUCoA1_02193        | -50                                          | <u>4.3</u>  | ATAAAgaTTTtT         |                                    |                           |
|                                           |                      |                            |                      | -34                                          | 4.79        | AaAAtaTTTAT          |                                    |                           |
| <i>Thermoproteus tenax</i> Kra 1          | TTX_0743             | <i>thiC</i>                | Tneu_0530            | 5                                            | 4.4         | AaAaccTTTTAT         |                                    |                           |
|                                           |                      | <i>thi4</i>                | Tneu_1052            | -32                                          | <u>4.46</u> | AaAAtcTaTTTTAT       |                                    |                           |
|                                           |                      | <i>tenA1-tenA2</i>         | Tneu_1074            | -32                                          | 5.12        | AaAAATTTTTAT         |                                    |                           |
| <i>Thermoproteus uzoniensis</i> 768-20    | TUZN_0486            | <i>thiT</i>                | Tneu_1075            | -36                                          | 5.12        | ATAAAATTTTTT         |                                    |                           |
|                                           |                      | <i>thi(DN)</i>             | Tneu_1881            | -50                                          | <u>4.45</u> | AaAacgTTTTAT         |                                    |                           |
| <i>Vulcanisaeta distributa</i> DSM 14429  | Vdis_2360            | <i>thiC</i>                | TTX_0287             | -32                                          | 4.89        | ATAAATTaTTTTAT       |                                    |                           |
| <i>Vulcanisaeta moutnovskia</i> 768-28    | VMUT_0712            | <i>thi4</i>                | TTX_0666             | -15                                          | 4.5         | ATAAAcTgaTTAT        |                                    |                           |
|                                           |                      | <i>thiT2</i>               | TUZN_0079            | 8                                            | <u>4.23</u> | ATAAAATTaTAT         |                                    |                           |
|                                           |                      | <i>thiT</i>                | Vdis_2247            | -32                                          | 4.99        | ATAAAATaTTtT         |                                    |                           |
|                                           |                      | <i>thi4</i>                | Vdis_2303            | -38                                          | <u>4.08</u> | ATAAAtgTgTTAT        |                                    |                           |
| <i>Caldivirga maquilingensis</i> IC-167   | Cmaq_1034            | <i>thi4</i>                | Vdis_2373            | -37                                          | <u>4.37</u> | ATAActTgTTTTAT       |                                    |                           |
|                                           |                      | <i>thi(DN)</i>             | Vdis_2402            | -39                                          | <u>4.39</u> | ATAAAAgcTTTTAT       |                                    |                           |
|                                           |                      | <i>thiT</i>                | VMUT_0613            | -7                                           | 4.7         | ATAAATTTgTTAT        |                                    |                           |
| <i>Caldivirga maquilingensis</i> IC-167   | Cmaq_1034            | <i>thi4</i>                | VMUT_0723            | -37                                          | <u>4.37</u> | ATAActTgTTTTAT       |                                    |                           |
|                                           |                      | <i>thi(DN)</i>             | VMUT_0747            | -38                                          | <u>4.47</u> | ATAAAgaTTTTAT        |                                    |                           |
| <i>Caldivirga maquilingensis</i> IC-167   | Cmaq_1034            | <i>thiM-thiE</i>           | Cmaq_0062            | -66                                          | 4.76        | ATAAttAaTTTTAT       |                                    |                           |

|                |           |     |             |               |
|----------------|-----------|-----|-------------|---------------|
| <i>thi(DN)</i> | Cmaq_0452 | -62 | <u>4.18</u> | ATAAccATgTTAT |
| <i>thiT</i>    | Cmaq_0759 | -25 | <u>4.37</u> | ATAAATgTgTTAT |
| <i>thi4</i>    | Cmaq_1420 | -64 | <u>4.43</u> | ATAAAAATagTAT |

**Thermoproteales (Thermofilum) (Motif-III) Threshold=5.0 TATAACnnnGTTATA**

|                                          |            |               |             |      |             |                  |       |
|------------------------------------------|------------|---------------|-------------|------|-------------|------------------|-------|
| <i>Thermofilum pendens</i> Hrk5          | Tpen_0069  | <i>ykoEDC</i> | Tpen_0068   | -113 | 5.02        | TATAACTTgGTTAaa  | 31 nt |
|                                          |            |               |             | -82  | 5.43        | cATAACcGAGTTATA  | 54 nt |
|                                          |            |               |             | -28  | 5.06        | TATAACcagGTTtTg  |       |
|                                          |            | <i>thiR</i>   | Tpen_0069   | -170 | 5.06        | cAaaCctgGTTATA   |       |
|                                          |            |               |             | -116 | 5.43        | TATAACTCgGTTATg  |       |
|                                          |            |               |             | -85  | 5.02        | TtTAACCaAGTTATA  |       |
| <i>Thermofilum</i> sp. 1910b             | N186_01270 | <i>ykoEDC</i> | N186_01265  | -169 | 5.18        | TtTAACCTcGTTATA  | 47 nt |
|                                          |            |               |             | -122 | 5.16        | TATAACTCtGTTATg  | 28 nt |
|                                          |            |               |             | -94  | 5.22        | cAaaACTCgGTTATA  |       |
|                                          |            | <i>thiR</i>   | N186_01270  | -90  | 5.22        | TATAACcGAGTTtTg  |       |
|                                          |            |               |             | -62  | 5.16        | cATAACCaGAGTTATA |       |
|                                          |            |               |             | -15  | 5.18        | TATAACTGAGTTAaa  |       |
| <i>Thermofilum carboxyditrophus</i> 1505 | TCARB_1341 | <i>ykoEDC</i> | TCARB_1340  | -171 | 5.18        | TtTAACCTcGTTATA  | 47 nt |
|                                          |            |               |             | -124 | 5.16        | TATAACTCtGTTATg  | 28 nt |
|                                          |            |               |             | -96  | 5.22        | cAaaACTCgGTTATA  |       |
|                                          |            | <i>thiR</i>   | TCARB_1341  | -112 | 5.22        | TATAACcGAGTTtTg  |       |
|                                          |            |               |             | -84  | 5.16        | cATAACCaGAGTTATA |       |
|                                          |            |               |             | -37  | 5.18        | TATAACTGAGTTAaa  |       |
| <i>Thermofilum</i> sp. 1807-2            | TCARB_1341 | <i>ykoEDC</i> | MA03_01135* | -161 | 5.23        | TaaAACTagGTTATA  | 75 nt |
|                                          |            |               |             | -86  | 5.31        | cATAACTagGTTATA  | 53 nt |
|                                          |            |               |             | -33  | <u>4.75</u> | TATAACcagaTTATA  |       |
|                                          |            | <i>thiR</i>   | MA03_01130  | -165 | <u>4.75</u> | TATAAtctgGTTATA  |       |
|                                          |            |               |             | -112 | 5.31        | TATAACcctAGTTATg |       |
|                                          |            |               |             | -37  | 5.23        | TATAACcctAGTTtTA |       |

**Desulfurococcales (Motif-IV-a) Threshold=4.5 wwATAACnnnGTTATww**

|                                             |            |                                            |             |                       |             |                    |             |
|---------------------------------------------|------------|--------------------------------------------|-------------|-----------------------|-------------|--------------------|-------------|
| <i>Desulfurococcus fermentans</i> DSM 16532 | Desfe_0411 | <i>X-thiC</i>                              | Desfe_0199  | -62                   | 4.99        | TAATAACaTtaTTATcA  |             |
|                                             |            | <i>thi(DN)</i>                             | Desfe_0794  | -53                   | 4.7         | TtATAAatTtGTTATtG  |             |
|                                             |            | <i>thi4</i>                                | Desfe_0795  | -51                   | 4.7         | cAATAACCaAatTTATaA |             |
|                                             |            | <i>ykoE</i>                                | Desfe_0090  | -58                   | 4.63        | TAATAACCaTgATATag  |             |
|                                             |            | <i>ykoDC</i>                               | Desfe_0187  | -35                   | <u>4</u>    | aAgTAgCtAaaTTATTA  |             |
|                                             |            | <i>Desulfurococcus kamchatkensis</i> 1221n | DKAM_0343   | <i>X-thiC</i>         | DKAM_0123   | -92                | 5.12        |
| <i>thi4</i>                                 | DKAM_0713  |                                            |             | -49                   | 4.7         | cAATAACCaAatTTATaA |             |
| <i>thi(DN)</i>                              | DKAM_0714  |                                            |             | -40                   | 4.7         | TtATAAatTtGTTATtG  |             |
| <i>ykoE</i>                                 | DKAM_1465  |                                            |             | -46                   | 4.92        | TAATAACCaTgATATaA  |             |
| <i>ykoDC</i>                                | DKAM_0109  |                                            |             | -21                   | <u>4</u>    | aAgTAgCtAaaTTATTA  |             |
| <i>Desulfurococcus mucosus</i> DSM 2162     | Desmu_0750 |                                            |             | <i>cytX-X-thi(DN)</i> | Desmu_0542  | -67                | 4.82        |
|                                             |            | <i>ykoE</i>                                | Desmu_0176  | -65                   | <u>4.34</u> | TgATAACaTGGTgATTt  |             |
|                                             |            | <i>ykoDC</i>                               | Desmu_0257  | -43                   | <u>4.31</u> | TAATAAaCtGTTATct   |             |
|                                             |            | <i>Staphylothermus marinus</i> F1          | Smar_1383   | <i>thi(DN)</i>        | Smar_0049   | -73                | <u>4.49</u> |
| -50                                         | 4.77       |                                            |             |                       |             | TgATAACtAaaTTATat  |             |
| <i>ykoDC</i>                                | Smar_0050  |                                            |             | -58                   | 4.77        | atATAAttTaGTTATcA  | 23 nt       |
|                                             |            |                                            |             | -35                   | <u>4.49</u> | atATAACtTgATATcg   |             |
| <i>thi4</i>                                 | Smar_0052  |                                            |             | -60                   | 5.19        | TtATAACCTGATATTA   | 23 nt       |
|                                             |            |                                            |             | -37                   | <u>4.29</u> | TAATAACcgaGTaATaA  |             |
| <i>ykoE-tenA</i>                            | Smar_0053  | -64                                        | <u>4.29</u> | TtAtAcTcGTTATTA       | 23 nt       |                    |             |
|                                             |            | -41                                        | 5.19        | TAATAAtCAGGTTATaA     |             |                    |             |
| <i>Staphylothermus hellenicus</i> DSM 12710 | Shell_1065 | <i>ykoE-tenA</i>                           | Shell_0763  | -63                   | <u>4.28</u> | TtAtAcTcagTTATTA   | 23 nt       |
|                                             |            |                                            |             | -40                   | 5.18        | TAATAAtAGGTTATaA   |             |
|                                             |            | <i>thi4</i>                                | Shell_0764  | -63                   | 5.18        | TtATAACCTaaTTATTA  | 23 nt       |
|                                             |            |                                            |             | -40                   | <u>4.28</u> | TAATAACtgaGTaATaA  |             |
|                                             |            | <i>ykoDC</i>                               | Shell_0766  | -56                   | 4.77        | atATAAttTaGTTATcA  | 23 nt       |
|                                             |            |                                            |             | -33                   | <u>4.49</u> | atATAACtTgATATcg   |             |
| <i>thi(DN)</i>                              | Shell_0767 | -79                                        | <u>4.49</u> | cgATAACCaGTTATat      | 23 nt       |                    |             |
| <i>cytX</i>                                 | Shell_0907 | -56                                        | 4.77        | TgATAACtAaaTTATat     |             |                    |             |
| <i>Thermosphaera aggregans</i> DSM 11486    | Tagg_0649  | <i>ykoE</i>                                | Tagg_0461   | -56                   | 4.97        | TtATAACtTaGaTATTA  |             |
|                                             |            | <i>ykoDC</i>                               | Tagg_0459   | -63                   | <u>4.3</u>  | TgATAAttcGtTTATcA  |             |
|                                             |            | <i>thiD</i>                                | Tagg_0777   | -48                   | <u>4.13</u> | TAATcACCTaGaTATcA  |             |
| <i>Thermogladius cellulolyticus</i> 1633    | TCELL_1104 | <i>thiC</i>                                | TCELL_1013  | -62                   | 4.57        | TtATAACcCGTTATtG   | 23 nt       |
|                                             |            |                                            |             | -39                   | 4.81        | TtATAtCCIGaTTATaA  |             |
|                                             |            |                                            |             | -64                   | <u>4.14</u> | TgATAAaCgtGTTATag  | 23 nt       |
|                                             |            | <i>thi4-thi(DN)</i>                        | TCELL_1023  | -41                   | 4.63        | TAtTAACCTGaTTATaA  |             |
|                                             |            |                                            |             | -41                   | 4.85        | TAATAACcAGGTTtTaA  |             |
|                                             |            | <i>ykoE</i>                                | TCELL_0952  | -41                   | 4.85        | TAATAACcAGGTTtTaA  |             |
| <i>ykoDC</i>                                | TCELL_0944 | -26                                        | <u>4.06</u> | cgATAACtTGGTtCtag     |             |                    |             |

**Desulfurococcales (Motif-IV-b) Threshold=5.0 wwAwACnnnGTWATww**

|                                        |           |             |           |     |      |                    |
|----------------------------------------|-----------|-------------|-----------|-----|------|--------------------|
| <i>Hyperthermus butylicus</i> DSM 5456 | Hbut_0125 | <i>thi4</i> | Hbut_0253 | -53 | 5.01 | TTAgacACACTGTAATcT |
|----------------------------------------|-----------|-------------|-----------|-----|------|--------------------|

|                                        |             |                               |             |      |      |                    |                      |                          |
|----------------------------------------|-------------|-------------------------------|-------------|------|------|--------------------|----------------------|--------------------------|
|                                        |             | <i>thiC</i>                   | Hbut_0289   | -70  | 5.19 | TTATTACAGTGTtAtgT  |                      |                          |
| <i>Ignisphaera aggregans</i> DSM 17230 | lgag_0434   | <i>thi(DN)</i>                | lgag_1669   | -30  | 5.05 | TTAaTACTtTGTtATAT  |                      |                          |
|                                        |             | <i>thiC</i>                   | lgag_1298   | -64  | 4.6  | ATAgTACTActTAATAA  |                      |                          |
| <b>Fervidicoccales (Motif-V)</b>       |             |                               |             |      |      |                    | <b>Threshold=4.8</b> | <b>TnATAAnnnnnTTATnA</b> |
| <i>Fervidococcus fontis</i> Kam940     | FFONT_0578  | <i>thi4</i>                   | FFONT_0392  | -51  | 4.9  | TTATAACAaAaATTtTtA | 23 nt                |                          |
|                                        |             |                               |             | -28  | 4.41 | TgATtATATaGTTATAt  |                      |                          |
|                                        |             | <i>thiR</i>                   | FFONT_0578  | -120 | 4.91 | TaATAATAAgtTtTtTAA | 87 nt                |                          |
|                                        |             |                               |             | -33  | 4.22 | TaATAACcTgGTaATgt  |                      |                          |
|                                        |             | <i>ykoE</i>                   | FFONT_0579  | -74  | 4.89 | TTgTAAaATtTtTTATAA | 34 nt                |                          |
|                                        |             |                               |             | -40  | 4.84 | TTATAtCcTTATTATtA  |                      |                          |
|                                        |             | <i>ykoDC</i>                  | FFONT_0581  | -48  | 5    | TaATAATATatTTATcA  |                      |                          |
| <b>Euryarchaeota</b>                   |             |                               |             |      |      |                    | <b>Threshold=4.4</b> | <b>AWAACnnnnGTTWT</b>    |
| <b>Thermococci (Thermococcales)</b>    |             |                               |             |      |      |                    |                      |                          |
| <i>Pyrococcus abyssi</i> GE5           | PAB0877     | <i>thi4</i>                   | PAB0536     | -48  | 5.1  | AtAACaAAGTTTT      | 21 nt                |                          |
|                                        |             |                               |             | -27  | 5.4  | AAAACtAAGTTTT      |                      |                          |
|                                        |             | <i>thiC</i>                   | PAB1930     | -37  | 4.31 | AttACTTgGTTTT      | 21 nt                |                          |
|                                        |             |                               |             | -16  | 3.84 | AtAACaAgGTgaT      |                      |                          |
|                                        |             | <i>thiB</i>                   | PAB1835     | -36  | 4.07 | AAAAtcTtaTTTT      |                      |                          |
|                                        |             | <i>tenAA-cytX-thiME(DN)</i>   | PAB1641     | -69  | 4.89 | AtAACcAAGTTTT      |                      |                          |
| <i>Pyrococcus furiosus</i> DSM 3638    | PF0601      | <i>thi4</i>                   | PF1530      | -113 | 4.29 | AtAAtaggGTTTT      | 21 nt -6 bp          |                          |
|                                        |             |                               |             | -92  | 5.18 | AAAACtTgGTTTT      |                      |                          |
|                                        |             |                               |             | -47  | 5.29 | AAAACaAAGTTTT      | 21 nt                |                          |
|                                        |             |                               |             | -26  | 5.3  | AAAACtCAGTTTT      |                      |                          |
|                                        |             | <i>thiC</i>                   | PF1531      | -115 | 5.3  | AAAACtAgGTTTT      | 21 nt -33 bp         |                          |
|                                        |             |                               |             | -94  | 5.29 | AAAACtTtGTTTT      |                      |                          |
|                                        |             |                               |             | -49  | 5.18 | AAAACcAAGTTTT      | 21 nt                |                          |
|                                        |             |                               |             | -28  | 4.29 | AAAACcctaTTaT      |                      |                          |
|                                        |             | <i>tenAA-cytX-thiME(DN)</i>   | PF1338      | -67  | 5.02 | AtAACTTgGTTTT      | 21 nt -21 bp         |                          |
|                                        |             |                               |             | -46  | 4.05 | AcAAaaAAGTTaT      |                      |                          |
|                                        |             | <i>thiB</i>                   | PF1751      | -44  | 4.65 | AgAAcAcAGTTTT      | 21 nt -20 bp         |                          |
|                                        |             |                               |             | -23  | 3.94 | AgAAaTggGTTTT      |                      |                          |
| <i>Pyrococcus horikoshii</i> OT3       | PH0716      | <i>thi4</i>                   | PH1357      | -38  | 5.13 | AtAACaAAGTTTT      | 21 nt                |                          |
|                                        |             |                               |             | -17  | 4.51 | AAAAtgAAGTTTT      |                      |                          |
|                                        |             | <i>thiB</i>                   | PH1349      | -64  | 4.85 | AAAtACTTAGTTTT     | 21 nt                |                          |
|                                        |             |                               |             | -43  | 4.23 | AtAgCTTgGTTTT      |                      |                          |
|                                        |             | <i>tenAA-cytX-thiME(DN)</i>   | PH1161      | -60  | 4.69 | AtAACaAgTTaT       | 21 nt                |                          |
|                                        |             |                               |             | -39  | 4.05 | AcAAaaAAGTTaT      |                      |                          |
| <i>Pyrococcus</i> sp. NA2              | PNA2_1361   | <i>thiC</i>                   | PNA2_0094   | -39  | 4.41 | AttACTTgGTTTT      |                      |                          |
|                                        |             | <i>thi4-2</i>                 | PNA2_1583   | -38  | 4.62 | AAAAtcAAGTTaT      | 21 nt                |                          |
|                                        |             |                               |             | -17  | 4.08 | AtAACTTgGTgaT      |                      |                          |
|                                        |             | <i>tenAA-cytX-thiME(DN)</i>   | PNA2_1769   | -67  | 4.98 | AtAACTcAGTTaT      | 21 nt                |                          |
|                                        |             |                               |             | -46  | 3.77 | AcAAaaAgGTTaT      |                      |                          |
|                                        |             | <i>thi4-1</i>                 | PNA2_1941   | -47  | 5.13 | AtAACaAAGTTTT      | 21 nt                |                          |
|                                        |             |                               |             | -26  | 5.3  | AAAACtAgGTTTT      |                      |                          |
| <i>Pyrococcus</i> sp. ST04             | Py04_0745   | <i>thi4</i>                   | Py04_1231   | -39  | 5.13 | AtAACaAAGTTTT      | 21 nt                |                          |
|                                        |             |                               |             | -18  | 5.46 | AAAACtTAGTTTT      |                      |                          |
|                                        |             | <i>tenAA-cytX-thiME(DN)</i>   | Py04_0940   | -68  | 4.69 | AtAACcAtGTTaT      | 21 nt                |                          |
|                                        |             |                               |             | -47  | 3.89 | AcAAaagGTTaT       |                      |                          |
| <i>Pyrococcus yayanosii</i> CH1        | PYCH_07480  | <i>thi4-1</i>                 | PYCH_06240  | -65  | 5.13 | AtAACaAAGTTTT      | 21 nt                |                          |
|                                        |             |                               |             | -44  | 5.46 | AAAACtTAGTTTT      |                      |                          |
|                                        |             | <i>thiC</i>                   | PYCH_06250  | -49  | 5.46 | AAAACtAAGTTTT      | 21 nt                |                          |
|                                        |             |                               |             | -28  | 5.13 | AAAACtTtGTTaT      |                      |                          |
|                                        |             | <i>thi4-2</i>                 | PYCH_08650  | -36  | 4.62 | AAAAtcAAGTTaT      | 21 nt                |                          |
|                                        |             |                               |             | -15  | 4.08 | AtAACTTgGTgaT      |                      |                          |
| <i>Thermococcus litoralis</i> DSM 5473 | OCC_09391   | <i>thiC</i>                   | OCC_06561   | -56  | 5.3  | AAAACtAgGTTTT      | 21 nt                |                          |
|                                        |             |                               |             | -35  | 4.73 | AAAACtTtaTTaT      |                      |                          |
|                                        |             |                               |             | -24  | 4.86 | AtAACcAAGTTaT      |                      |                          |
|                                        |             | <i>thi4</i>                   | OCC_06556   | -80  | 4.86 | AtAACTTgGTTaT      | 21 nt                |                          |
|                                        |             |                               |             | -69  | 4.73 | AtAAtaAAGTTTT      |                      |                          |
|                                        |             |                               |             | -48  | 5.3  | AAAACtCAGTTTT      |                      |                          |
|                                        |             | <i>cytX-thiMEW(DN)</i>        | OCC_04984   | -68  | 4.3  | AcAACTTgaTTTT      | 21 nt                |                          |
|                                        |             |                               |             | -47  | 3.77 | AcAAaaAgGTTaT      |                      |                          |
|                                        |             | <i>thiB</i>                   | OCC_11612   | -46  | 4.65 | AgAAcAcAGTTTT      | 21 nt                |                          |
|                                        |             |                               |             | -25  | 3.94 | AgAAaTggGTTTT      |                      |                          |
|                                        |             | <i>thiR-X-yjbQ</i>            | OCC_09391   | -38  | 4.74 | AtAACcTgGTTTT      |                      |                          |
| <i>Thermococcus barophilus</i> MP      | TERMP_01433 | <i>cytX-thiM-thiE-thi(DN)</i> | TERMP_00505 | -70  | 5.14 | AtAACTTAGTTaT      | 21 nt                |                          |
|                                        |             |                               |             | -49  | 3.89 | AcAAaagGTTaT       |                      |                          |
|                                        |             | <i>thiPQ</i>                  | TERMP_01606 | -18  | 5.46 | AAAACtAAGTTTT      |                      |                          |
|                                        |             | <i>thiB</i>                   | TERMP_01742 | -70  | 4.41 | AcAAtaAAGTTTT      |                      |                          |
|                                        |             | <i>thiR-X-yjbQ</i>            | TERMP_01433 | -23  | 4.18 | AtAAcccGTTTT       |                      |                          |
| <i>Thermococcus sibiricus</i> MM 739   | TSIB_0198   | <i>cytX-tenA-thiMEW(DN)</i>   | TSIB_0467   | -69  | 5.02 | AtAACTTgGTTTT      | 21 nt                |                          |



|                                                                      |                      |                         |           |  |                      |      |                        |       |
|----------------------------------------------------------------------|----------------------|-------------------------|-----------|--|----------------------|------|------------------------|-------|
|                                                                      |                      |                         |           |  | -48                  | 4.05 | AcAaaaAGTTaT           |       |
|                                                                      |                      | <i>thiB</i>             | TSIB_0369 |  | -35                  | 4.49 | AgAACagAGTTaT          | 21 nt |
|                                                                      |                      |                         |           |  | -14                  | 4.86 | AAAAaTTAGTTTT          |       |
|                                                                      |                      | <i>thiR-X-yjbQ</i>      | TSIB_0198 |  | -38                  | 5.14 | AtAACTgAGTTTT          |       |
| <i>Thermococcus onnurineus</i> NA1                                   | TON_1436             | <i>thiPQ</i>            | TON_1959  |  | -16                  | 4.54 | AAAACcgAGTTgT          |       |
|                                                                      |                      | <i>thiB</i>             | TON_0963  |  | -25                  | 3.93 | AcAACcgAGTaT           |       |
|                                                                      |                      | <i>thiR-X-yjbQ</i>      | TON_1436  |  | -23                  | 4.58 | AtAAACcgGTTTT          |       |
| <i>Thermococcus kodakaraensis</i> DSM 3638                           | TK2197               | <i>thiC</i>             | TK0433    |  | -62                  | 5.46 | AAAACCTAAGTTTT         | 21 nt |
|                                                                      |                      |                         |           |  | -41                  | 5.13 | AAAACCTtGTTaT          |       |
|                                                                      |                      | <i>thi4-thi(DN)</i>     | TK0434    |  | -67                  | 5.13 | AtAACaAAGTTTT          |       |
|                                                                      |                      |                         |           |  | -46                  | 5.46 | AAAACCTAGTTTT          |       |
|                                                                      |                      | <i>thiPQ</i>            | TK0159    |  | 56                   | 4.38 | AgAACcgAGTTaT          |       |
|                                                                      |                      | <i>thiR-yjbQ</i>        | TK2197    |  | -26                  | 4.26 | AtAAACcgTgTgT          |       |
| <i>Thermococcus gammatolerans</i> EJ3                                | TGAM_2087            | <i>thiC</i>             | TGAM_1269 |  | -61                  | 5.55 | AAAACCTAAGTTTT         | 21 nt |
|                                                                      |                      |                         |           |  | -40                  | 5.17 | AAAACCTTGTAT           |       |
|                                                                      |                      | <i>thi4-thi(DN)</i>     | TGAM_1270 |  | -45                  | 5.55 | AAAACCTAGTTTT          |       |
|                                                                      |                      |                         |           |  | -66                  | 5.17 | ATAACAAAGTTTT          |       |
|                                                                      |                      | <i>thiB</i>             | TGAM_1706 |  | -16                  | 4.47 | AAAACCGGTTTT           |       |
| <i>Thermococcus</i> sp. 4557                                         | GQS_08390            | <i>thiC</i>             | GQS_02010 |  | -61                  | 5.46 | AAAACCTAAGTTTT         | 21 nt |
|                                                                      |                      |                         |           |  | -40                  | 5.13 | AAAACCTtGTTaT          |       |
|                                                                      |                      | <i>thi4-thi(DN)</i>     | GQS_02015 |  | -67                  | 5.13 | AtAACaAAGTTTT          |       |
|                                                                      |                      |                         |           |  | -46                  | 5.46 | AAAACCTAGTTTT          |       |
|                                                                      |                      | <i>thiPQ</i>            | GQS_05315 |  | -18                  | 4.54 | AAAACcgAGTTgT          |       |
|                                                                      |                      | <i>thiB</i>             | GQS_10685 |  | -26                  | 4.13 | AAAACcgGTaT            |       |
|                                                                      |                      | <i>thiR-X-yjbQ</i>      | GQS_08390 |  | -25                  | 4.74 | AtAACcTgGTTTT          |       |
| <i>Thermococcus</i> sp. AM4                                          | TAM4_328             | <i>thiB</i>             | TAM4_1850 |  | -24                  | 5.01 | AAAACcAtGTTTT          |       |
| <i>Thermococcus</i> sp. CL1                                          | CL1_1295             | <i>thi4-thi(DN)</i>     | CL1_0036  |  | -65                  | 5.13 | AtAACaAAGTTTT          | 21 nt |
|                                                                      |                      |                         |           |  | -44                  | 5.3  | AAAACtAGTTTT           |       |
|                                                                      |                      | <i>thiC</i>             | CL1_0038  |  | -63                  | 5.46 | AAAACCTAAGTTTT         | 21 nt |
|                                                                      |                      |                         |           |  | -42                  | 5.13 | AAAACCTtGTTaT          |       |
|                                                                      |                      | <i>thiPQ</i>            | CL1_0708  |  | -18                  | 5.02 | AAAACcgAGTTTT          |       |
|                                                                      |                      | <i>thiR-yjbQ</i>        | CL1_1295  |  | -25                  | 4.58 | AtAAACcgGTTTT          |       |
| <b>Halobacteria (Halobacteriales / Haloferacales / Natrialbales)</b> |                      |                         |           |  | <b>Threshold=3.8</b> |      | <b>TAYnACnnnGtnRTA</b> |       |
| <i>Natronomonas pharaonis</i> DSM 2160                               | NP5168A              | <i>thi4</i>             | NP5174A   |  | -13                  | 4.53 | TAtaACtAGtGTA          |       |
|                                                                      |                      | <i>thiC</i>             | NP2210A   |  | -28                  | 3.97 | TAttAgctgGtGTA         | 12 nt |
|                                                                      |                      |                         |           |  | -15                  | 3.74 | TAttACTagaTtGtT        |       |
|                                                                      |                      | <i>thiE-thiM</i>        | NP4054A   |  | -13                  | 4.17 | TACCAGcGgGtGTA         |       |
| <i>Halorhabdus utahensis</i> DSM 12940                               | Huta_2411; Huta_2715 | <i>thi4</i>             | Huta_2718 |  | -13                  | 4.83 | TACCACtAGTGGTA         |       |
|                                                                      |                      | <i>thiC</i>             | Huta_2472 |  | -41                  | 4.56 | TtCACtAgGtTaTA         | 12 nt |
|                                                                      |                      |                         |           |  | -28                  | 3.93 | TAtaAtctAGTaGTA        |       |
|                                                                      |                      | <i>tenA1-tenA2-thiV</i> | Huta_0684 |  | -55                  | 3.93 | TAtaAtTtgTaGTA         | 12 nt |
|                                                                      |                      |                         |           |  | -42                  | 3.97 | TAttAgTGAGtTaTA        |       |
|                                                                      |                      | <i>thiBPQ</i>           | Huta_0388 |  | -24                  | 3.84 | TACCACtAGTcaaA         | 12 nt |
|                                                                      |                      |                         |           |  | -11                  | 4.44 | aACCACcaAGTGGTg        |       |
| <i>Haloarcula marismortui</i> ATCC 43049                             | rrnAC1777; rrnAC1764 | <i>thi4</i>             | rrnAC1782 |  | (-26)                | 3.9  | TACCACcaAGaGaTA        | 12 nt |
|                                                                      |                      |                         |           |  | (-13)                | 4.63 | TAttACTagTGGTA         |       |
|                                                                      |                      | <i>thiC</i>             | rrnAC1182 |  | -27                  | 4.5  | TAtaACTtgTaGTA         | 12 nt |
|                                                                      |                      |                         |           |  | -14                  | 4.37 | TAtaACctAGTgTt         |       |
|                                                                      |                      | <i>tenA1-tenA2-thiV</i> | rrnAC1765 |  | -59                  | 4.55 | TACaACcaAGTgGTA        |       |
|                                                                      |                      | <i>thiBPQ</i>           | rrnAC0147 |  | -24                  | 3.86 | TACCACtGgGTgA          | 12 nt |
|                                                                      |                      |                         |           |  | -11                  | 3.49 | gACCACgGtGtaaTg        |       |
| <i>Haloarcula hispanica</i> ATCC 33960                               | HAH_2305; HAH_2294   | <i>thi4</i>             | HAH_2313  |  | (-13)                | 4.75 | TAtCACtAgTGGTA         |       |
|                                                                      |                      | <i>thiC</i>             | HAH_1784  |  | -27                  | 4.5  | TAtaACcaAGTaGTA        | 12 nt |
|                                                                      |                      |                         |           |  | -14                  | 4.37 | TAtaACctAGTgTt         |       |
|                                                                      |                      | <i>tenA1-tenA2-thiV</i> | HAH_2295  |  | -59                  | 4.55 | TACaACTtgGtGTA         |       |
|                                                                      |                      | <i>thiBPQ</i>           | HAH_0897  |  | -24                  | 3.86 | TACCACtGgGTgA          | 12 nt |
|                                                                      |                      |                         |           |  | -11                  | 3.9  | gACCACgGAGTaaTg        |       |
| <i>Halomicrobium mukohataei</i> DSM 12286                            | Hmuk_1352; Hmuk_0022 | <i>thi4</i>             | Hmuk_0002 |  | -26                  | 3.48 | TgCaACgtgGTGGTA        | 12 nt |
|                                                                      |                      |                         |           |  | -13                  | 4.68 | TACCACtAgGtGTA         |       |
|                                                                      |                      | <i>thiC</i>             | Hmuk_2297 |  | -28                  | 3.99 | TAtaAtctAGTgTaTA       | 12 nt |
|                                                                      |                      |                         |           |  | -15                  | 3.7  | TAtaACTagcTtaTc        |       |
| <i>Haloterrigena turkmenica</i> DSM 5511                             | Htur_2542; Htur_1469 | <i>thi4</i>             | Htur_1462 |  | -26                  | 3.53 | cACCACgCgGTGcTA        | 12 nt |
|                                                                      |                      |                         |           |  | -13                  | 4.68 | TACCACcaAGTgGTA        |       |
|                                                                      |                      | <i>thiC</i>             | Htur_1332 |  | -28                  | 4.01 | TAtaACTCgaTgTaTA       | 12 nt |
|                                                                      |                      |                         |           |  | -15                  | 4.27 | TACaACctAGTtaTc        |       |
|                                                                      |                      | <i>thiBPQ</i>           | Htur_2516 |  | -24                  | 4.21 | gACCACcCAGTGGaA        | 12 nt |
|                                                                      |                      |                         |           |  | -11                  | 3.87 | aACCACcCgTaaTg         |       |
| <i>Natrialba magadii</i> ATCC 43099                                  | Nmag_0434; Nmag_2413 | <i>thi4</i>             | Nmag_2419 |  | -26                  | 3.9  | cActACTGgaTgTaTA       | 12 nt |
|                                                                      |                      |                         |           |  | -13                  | 4.68 | TACCACctAGTgGTA        |       |
|                                                                      |                      | <i>thiC</i>             | Nmag_2593 |  | -28                  | 3.87 | TAtaAtctAGTaaTA        | 12 nt |
|                                                                      |                      |                         |           |  | -15                  | 4.27 | TACaACctAGTtaTc        |       |

|                                              |                        |                         |            |       |             |                 |       |      |
|----------------------------------------------|------------------------|-------------------------|------------|-------|-------------|-----------------|-------|------|
|                                              |                        | <i>thiBPQ</i>           | Nmag_0460  | -24   | <u>3.53</u> | aACCACaGAGTgtaA | 12 nt |      |
|                                              |                        |                         |            | -11   | 4.4         | aACCACCTgGTGaTg |       |      |
| <i>Halorubrum lacusprofundi</i> ATCC 49239   | Hlac_0446              | <i>thi4</i>             | Hlac_2980  | -26   | 3.9         | TACCACcGgGaGaTA | 12 nt |      |
|                                              |                        |                         |            | -13   | 4.77        | TAtCACTaAGTGGTA |       |      |
|                                              |                        | <i>thiBPQ</i>           | Hlac_2697  | -24   | 3.9         | aACCACcGgGTgtaA | 12 nt |      |
|                                              |                        |                         |            | -11   | 4.13        | aACaACcCgGTaaTg |       |      |
| <i>Haloquadratum walsbyi</i> DSM 16790       | HQ1277A                | <i>thi4</i>             | HQ1276A    | -26   | <u>3.25</u> | TAgtAgTtgGTaaTA | 12 nt |      |
|                                              |                        |                         |            | -13   | 4.31        | TaaCACCaAGTaaTA |       |      |
|                                              |                        | <i>tenA-thiV</i>        | HQ2369A    | -61   | 4.01        | TAttAgTtAGTtGTA |       |      |
| <i>Haloferax volcanii</i> DS2                | HVO_0662               | <i>thi4</i>             | HVO_0665   | -26   | 4.57        | TACTACTagGTaGTA | 12 nt | 0 bp |
|                                              |                        |                         |            | -13   | 4.65        | TAtCACTaAGTaGTA |       |      |
|                                              |                        | <i>thiC</i>             | HVO_2154   | -28   | <u>3.66</u> | TAttAactAGTtGTA | 12 nt | 0 bp |
|                                              |                        |                         |            | -15   | 3.84        | TAtCACTagcTaaTc |       |      |
|                                              |                        | <i>thiBPQ</i>           | HVO_0022   | -24   | 3.23        | TACCACaGAGTacaA | 12 nt |      |
|                                              |                        |                         |            | -11   | 4.15        | aACaACcGAGTaaTg |       |      |
| <i>Halobacterium</i> sp. NRC-1               | VNG0247C               | <i>thi4-thi(DN)</i>     | VNG2604G   | -26   | <u>3.74</u> | aAttAtctAGTtGTA | 12 nt |      |
|                                              |                        |                         |            | -13   | 3.89        | TACCAtgtAGTGGTA |       |      |
|                                              |                        | <i>thiC</i>             | VNG0715G   | -30   | 4.06        | TAttAtctAGTGGTA | 12 nt |      |
|                                              |                        |                         |            | -17   | 4.4         | TAtCACTaAGTaaTt |       |      |
|                                              |                        | <i>thiBPQ</i>           | VNG2395C   | -11   | 4.13        | aACaACcCgGTaaTg |       |      |
| <i>Halogeometricum borinquense</i> DSM 11551 | Hbor_25480             | <i>thi4</i>             | Hbor_25460 | -26   | <u>3.39</u> | TAgtAgcCAGTgaTA | 12 nt |      |
|                                              |                        |                         |            | -13   | 4.49        | TaaCACTagGTGGTA |       |      |
|                                              |                        | <i>thiC</i>             | Hbor_14920 | -28   | 3.96        | TAttAtTCgGTaGTA | 12 nt |      |
|                                              |                        |                         |            | -15   | 4.41        | TAtCACTagGTaGTc |       |      |
|                                              |                        | <i>thiBP</i>            | Hbor_02000 | -24   | <u>3.55</u> | TAtgACcaAGTGGgA | 12 nt |      |
|                                              |                        |                         |            | -11   | 4.15        | gACTACTCAGTaaTg |       |      |
|                                              |                        | <i>tenA1-tenA2-thiV</i> | Hbor_30560 | -55   | <u>3.73</u> | aACaACcCgaTaaTA |       |      |
| <i>Natrinema</i> sp. J7-2                    | NJ7G_1102; NJ7G_3692   | <i>thi4</i>             | NJ7G_3680  | -26   | 3.9         | cACTACcaAGTcaTA | 12 nt |      |
|                                              |                        |                         |            | -13   | 4.68        | TACCACctAGTtGTA |       |      |
|                                              |                        | <i>thiC</i>             | NJ7G_3772  | -28   | 3.91        | TAtaAtTCAGTaaTA | 12 nt |      |
|                                              |                        |                         |            | -15   | 4.27        | TACaACctAGTtaTc |       |      |
|                                              |                        | <i>tenA</i>             | NJ7G_3269  | -44   | 3.94        | TAttAgctAGTaaTA |       |      |
|                                              |                        | <i>thiE-thiM</i>        | NJ7G_0299  | -20   | 4.2         | TACTACcGAcTGGTA |       |      |
|                                              |                        | <i>thiBPQ</i>           | NJ7G_0450  | -24   | <u>3.32</u> | gACTACctAGTgcaA | 12 nt |      |
|                                              |                        |                         |            | -11   | 4.26        | aACCACcCgGTaaTg |       |      |
| <i>Natrinema pellirubrum</i> DSM 15624       | Natpe_1684; Natpe_2824 | <i>thi4</i>             | Natpe_2830 | -26   | 4.08        | TACTACTagGTcaTA | 12 nt |      |
|                                              |                        |                         |            | -13   | 4.68        | TACCACctAGTtGTA |       |      |
|                                              |                        | <i>thiC</i>             | Natpe_3081 | -28   | 4.5         | TAtaACctAGTaGTA | 12 nt |      |
|                                              |                        |                         |            | -15   | 4.27        | TACaACctAGTtaTc |       |      |
|                                              |                        | <i>thiBPQ</i>           | Natpe_3863 | -24   | 3.91        | gACCACtGAGTgtaA | 12 nt |      |
|                                              |                        |                         |            | -11   | 4.28        | aACCACcGAGTaaTg |       |      |
|                                              |                        | <i>thiE-thiM</i>        | Natpe_3729 | -20   | 4.02        | cACTACcGAcTGGTA |       |      |
| <i>Halopiger xanaduensis</i> SH-6            | Halxa_0732; Halxa_2856 | <i>thi4</i>             | Halxa_2863 | -26   | <u>3.37</u> | cACCACtGAGTccTA | 12 nt |      |
|                                              |                        |                         |            | -13   | 4.68        | TACCACctAGTtGTA |       |      |
|                                              |                        | <i>thiC</i>             | Halxa_3896 | -28   | <u>3.44</u> | TAtaACTagaTcaTA | 12 nt |      |
|                                              |                        |                         |            | -15   | 4.27        | TACaACctAGTtaTc |       |      |
|                                              |                        | <i>tenA</i>             | Halxa_2795 | -37   | <u>3.39</u> | gAtaACTaAtTtaTA | 12 nt |      |
|                                              |                        |                         |            | -24   | 4.53        | TAttACTaAGTaGTA |       |      |
|                                              |                        | <i>thiBPQ</i>           | Halxa_0707 | -24   | 4.11        | gACCACtCAGTaGaA | 12 nt |      |
|                                              |                        |                         |            | -11   | <u>3.78</u> | aACaACcCgGTaaTg |       |      |
| <i>Haloferax mediterranei</i> ATCC 33500     | HFX_0632               | <i>thi4</i>             | HFX_0634   | -26   | 4.69        | TACTACTtgGTGGTA | 12 nt |      |
|                                              |                        |                         |            | -13   | 4.65        | TAtCACTaAGTaGTA |       |      |
|                                              |                        | <i>thiC</i>             | HFX_2195   | (-28) | 4.24        | TAtCagctAGTGGTA | 12 nt |      |
|                                              |                        |                         |            | (-15) | 4.43        | TAtaACTagGTGGTt |       |      |
|                                              |                        | <i>thiBPQ</i>           | HFX_0021   | (-24) | <u>3.23</u> | TACCACaCAGTacaA |       |      |
|                                              |                        |                         |            | (-11) | 4.13        | aACaACcCgGTaaTg |       |      |
|                                              |                        | <i>tenA1-tenA2-thiV</i> | HFX_5296   | -59   | 4.25        | aAtaACcaAGTaaTA |       |      |
| <i>Halovivax ruber</i> XH-70                 | Halru_1158             | <i>thi4</i>             | Halru_1150 | -13   | 4.38        | TaaCACcGAGTtGTA |       |      |
|                                              |                        | <i>thiC</i>             | Halru_0933 | -27   | 4.1         | TAtgACTtAGTaGTA | 12 nt |      |
|                                              |                        |                         |            | -14   | 4.41        | TACTACctAGTgaTc |       |      |
|                                              |                        | <i>thiBPQ</i>           | Halru_0146 | -24   | 3.96        | gACCACcCAGTGGgA | 12 nt |      |
|                                              |                        |                         |            | -11   | <u>3.68</u> | gACCAtcCAGTaaTg |       |      |

<sup>1</sup>Divergently located adjacent operons that share ThiR-site(s) in the same promoter region are boxed.

<sup>2</sup>Weaker sites with scores that are 15% less than the threshold are underlined. Tandem sites are boxed. Score thresholds are given for each motif.

<sup>3</sup>Position of the 5' end of a ThiR-site is given relative to the translation start site. Positions relative to the corrected translation start sites are in parenthesis.

<sup>4</sup>Positions of transcription start sites (TSSs) mapped to the analyzed genomes according to the following references:

*Sulfolobus solfataricus* (Wurtzel et al., 2010); *Pyrococcus furiosus* (Yoon et al., 2011);

*Haloferax volcanii* (Brenneis et al., 2007; J. Maupin-Furlow, personal communication)

**Table S3. ThiR-binding sites and their experimental validation in *Metallosphaera yellowstonensis* MK1.**

| First gene locus tag | ThiR regulated operon          | Predicted ThiR-binding sites and synthetic DNA fragments used in fluorescence polarization DNA-binding assays <sup>1</sup> |
|----------------------|--------------------------------|----------------------------------------------------------------------------------------------------------------------------|
| MetMK1DRAFT_00023630 | <i>thi4</i>                    | <b>a</b> cccccggttggat <b>TATATAATCTAGTTTATAAG</b> <u>Gccacta</u> accccc                                                   |
| MetMK1DRAFT_00024350 | <i>thiT</i>                    | <b>a</b> ccccggttatg <b>tcTAAATAAGTAAGTTTATAAC</b> <u>Ccgactt</u> accccc                                                   |
| MetMK1DRAFT_00019590 | <i>tenA</i>                    | <b>a</b> cccc <b>ataactagATTATAAAATGATTTATAT</b> <u>Cccgcc</u> accccc                                                      |
| MetMK1DRAFT_00012900 | <i>trxA(N.C.)</i> <sup>2</sup> | <b>a</b> ggggaatataaaactttttaaacggggg                                                                                      |

<sup>1</sup> Predicted ThiR-binding sites are capitalized. DNA fragments from target gene upstream region are underlined.

Additional poly-cytosine oligonucleotides have been added on each side of DNA fragments to improve annealing of oligos.

For each DNA fragment, two complimentary single-stranded oligonucleotides were synthesized by IDT

at that one of these fragments (5'-3' shown here) was labeled by 6-carboxyfluorescein at 5' end (marked by red).

<sup>2</sup>NC, a negative control DNA fragments from promoter region of a gene that lack a ThiR-binding site.
